# Supplementary material for: Access to and delivery of acute ischaemic stroke treatments: A survey of national scientific societies and stroke experts in 44 European countries
Source: PubMed Central journal article supplement — Eur Stroke J. 2018 Jul 20;4(1):13–28. doi: 10.1177/2396987318786023 (PMC6533860; doi:10.1177/2396987318786023), 2018-07-20
Supplement: Supplemental_appendix.pdf [file Supplemental_appendix.pdf]

## Supplementary appendix

## Appendix 1

### Country respondents and affiliations

|                   |                    |                                                                                                                          |
|-------------------|--------------------|--------------------------------------------------------------------------------------------------------------------------|
| <b>Albania</b>    | <b>M Petrela</b>   | - Head of Department of Neurosciences, Mother Teresa University Hospital, Tirana, Albania                                |
|                   | <b>O Taka</b>      | - Neurologist in Neurovascular Service, Mother Teresa University Hospital, Tirana, Albania                               |
|                   | <b>E Enesi</b>     | - Neurointerventionist in Neuroradiology Service, Mother Teresa University Hospital, Tirana, Albania                     |
| <b>Austria</b>    | <b>S Kiechl</b>    | - President of the Austrian Stroke Organization<br>- Department of Neurology, Medical University of Innsbruck, Innsbruck |
|                   | <b>M Brainin</b>   | - Department of Neurosciences, Danube University Krems, Austria                                                          |
|                   | <b>F Fazekas</b>   | - Department of Neurology, Medical University of Graz                                                                    |
| <b>Belarus</b>    | <b>P Konovalov</b> | - Emergency medical care, City Clinical Hospital of Minsk, Minsk                                                         |
| <b>Belgium</b>    | <b>A Peeters</b>   | - President Belgian Stroke Council<br>- Cliniques Universitaires St. Luc, Brussels                                       |
|                   | <b>G Vanhooren</b> | - Secretary General of the Belgian Stroke Council<br>- Head of Department, AZ Sint-Jan Brugge-Oostende, Brugge           |
|                   | <b>L Defreyne</b>  | - Head of Department of Interventional Neuroradiology Ghent University Hospital                                          |
| <b>Bosnia and</b> | <b>H Haris</b>     | - JZU University Clinical Center Tuzla, Tuzla                                                                            |
|                   | <b>M Moranjkic</b> | - JZU University Clinical Center Tuzla, Tuzla                                                                            |

|                       |                     |                                                                                                                                                                                                                                                                                    |
|-----------------------|---------------------|------------------------------------------------------------------------------------------------------------------------------------------------------------------------------------------------------------------------------------------------------------------------------------|
| <b>Herzegovina</b>    |                     |                                                                                                                                                                                                                                                                                    |
| <b>Bulgaria</b>       | <b>S Andonova</b>   | - Chairman of the Stroke Section of the Bulgarian Society of Neurosonology and Cerebral Hemodynamics<br>- Head of Second Clinic of Neurology, Vice director healing diagnostic activity, University Hospital “St. Marina”, Medical University, Varna                               |
|                       | <b>I Staikov</b>    | - Professor of Neurology, Head of the Department of Neurology and Sleep Medicine with Stroke Unit, Hospital Board of Directors Member, Acibadem City Clinic Tokuda Hospital, Sofia<br>- Member of the Bulgarian Society of Neurology, member of the European Stroke Unit Committee |
| <b>Croatia</b>        | <b>H Budincevic</b> | - President of the Croatian Stroke Society<br>- Stroke and Intensive Care Unit, Department of Neurology, Sveti Duh University Hospital, Zagreb, Croatia.; School of Medicine, J.J. Strossmayer University of Osijek, Osijek, Croatia                                               |
|                       | <b>D Ozretic</b>    | - Department for Diagnostic and Interventional Radiology, University Hospital Centre Zagreb                                                                                                                                                                                        |
|                       | <b>B Malojčić</b>   | - University Hospital Centre Zagreb and Zagreb School of Medicine, Department of Neurology                                                                                                                                                                                         |
| <b>Czech Republic</b> | <b>A Tomek</b>      | - Chairman of the executive committee, Cerebrovascular section of Czech Neurological Society<br>- 2 <sup>nd</sup> Medical Faculty of Charles University, Prague                                                                                                                    |
| <b>Denmark</b>        | <b>H Iversen</b>    | - Chair, The Danish Thrombolysis Group, Vice-chair, Danish Stroke Society<br>- Stroke center, Dept. of Neurology, Rigshospitalet, University of Copenhagen.                                                                                                                        |
|                       | <b>SP Jonhsen</b>   | - Member of the Danish Stroke Society<br>- Department of Clinical Epidemiology, Aarhus University Hospital                                                                                                                                                                         |

|                |                      |                                                                                                                                                                                                 |
|----------------|----------------------|-------------------------------------------------------------------------------------------------------------------------------------------------------------------------------------------------|
| <b>Estonia</b> | <b>J Korv</b>        | - Chair of the Estonian Stroke Initiative; board member of the Estonian L. Puusepp Society of Neurologists and Neurosurgeons<br>- Department of Neurology and Neurosurgery, University of Tartu |
|                | <b>R Vibo</b>        | - Secretary of the Estonian Stroke Initiative<br>- Department of Neurology and Neurosurgery, University of Tartu                                                                                |
|                | <b>V Malikov</b>     | - Angiography, Radiology Department, North Estonia Medical Centre, Tallinn                                                                                                                      |
| <b>Finland</b> | <b>T Sairanen</b>    | - Chair of the Finnish Stroke Society, part of the Finnish Neurological Association<br>- Department of Neurology, Helsinki University Central Hospital, Helsinki                                |
|                | <b>D Strbian</b>     | - Member of the Finnish Society of Neurology and its subdivision of Cerebrovascular Disorders<br>- Department of Neurology, Helsinki University Central Hospital, Helsinki                      |
|                | <b>K Lappalainen</b> | - Member of the Finnish Radiological Association<br>- Department of Radiology, University of Helsinki, HUS Medical Imaging Center, Helsinki; University Central Hospital, Helsinki, Finland     |
| <b>France</b>  | <b>S Timsit</b>      | - President of the French Neurovascular Society (SFNV)<br>- Department of Neurology and Stroke Unit, CHRU Brest; Université de Bretagne Occidentale (UBO), Inserm U1078                         |
|                | <b>E Touze</b>       | - Secretary of the French Neurovascular Society (SFNV)<br>- Department of Neurology and Stroke Unit, CHRU Caen, Université Caen Normandie, Caen                                                 |
|                | <b>D Leys</b>        | - Immediate Past President of the French Society of Neurology<br>- Department of Neurology, CHU Lille, University of Lille, Inserm U1171                                                        |
| <b>Georgia</b> | <b>A Tsiskaridze</b> | - President, Georgian Stroke Organization, Tbilisi, Georgia                                                                                                                                     |

|                |                     |                                                                                                                                                                                                                                                                                         |
|----------------|---------------------|-----------------------------------------------------------------------------------------------------------------------------------------------------------------------------------------------------------------------------------------------------------------------------------------|
|                |                     | - Professor, Department of Neurology, Ivane Javakhishvili Tbilisi State University                                                                                                                                                                                                      |
|                | <b>I Burduladze</b> | - Director, Georgian Stroke Association                                                                                                                                                                                                                                                 |
|                |                     | - Chief Neurologist, Institute of Clinical Medicine, Tbilisi                                                                                                                                                                                                                            |
| <b>Germany</b> | <b>M Dichgans</b>   | - President, German Stroke Society<br>- Institute for Stroke and Dementia Research, University Hospital, LMU, Munich; Germany<br>- Munich Cluster of Systems Neurology (SyNergy), Munich, Germany                                                                                       |
|                | <b>J Röther</b>     | - Director, Head- and Neurocenter, Department of Neurology, Stroke Unit, Neurophysiology and Neurological Intensive Care Unit, Asklepios Klinik Altona, Hamburg                                                                                                                         |
|                | <b>J Fiehler</b>    | - Center for Radiology and Endoscopy, Universitätsklinikum Hamburg-Eppendorf                                                                                                                                                                                                            |
| <b>Greece</b>  | <b>G Tsivgoulis</b> | - General Secretary of the Hellenic Society of Cerebrovascular Diseases<br>- Second Department of Neurology, National & Kapodistrian University of Athens, Athens, Greece                                                                                                               |
|                | <b>E Brountzos</b>  | - Second Department of Radiology, National & Kapodistrian University of Athens, “Attikon University Hospital, Athens, Greece<br>- Vice President of Hellenic Society of Interventional Radiology; President of Cardiovascular and Interventional Radiological Society of Europe (CIRSE) |
| <b>Hungary</b> | <b>D Bereczki</b>   | - Department of Neurology, Semmelweis University, Budapest, Hungary                                                                                                                                                                                                                     |
|                | <b>C Óváry</b>      | - Board member of the Hungarian Stroke Society<br>- Deputy chief-director, National Institute of Clinical Neurosciences                                                                                                                                                                 |
|                | <b>I Szikora</b>    | - Member, Executive Committee, Hungarian Stroke Society                                                                                                                                                                                                                                 |

|                   |                        |                                                                                                                                                                                                                                               |
|-------------------|------------------------|-----------------------------------------------------------------------------------------------------------------------------------------------------------------------------------------------------------------------------------------------|
|                   |                        | - National Institute of Clinical Neurosciences, Semmelweis University, Budapest                                                                                                                                                               |
| <b>Iceland</b>    | <b>B Thorarinnsson</b> | - Cashier , Icelandic Neurological Society<br>- Specialist in Internal Medicine & Neurology, Dep. Neurology, University Hospital Reykjavik                                                                                                    |
|                   | <b>V Vilmarsson</b>    | - Landspítali University Hospital, Reykjavik                                                                                                                                                                                                  |
| <b>Ireland</b>    | <b>J Harbison</b>      | - Primary Investigator National Stroke Audit and Chair National Stroke Register Group                                                                                                                                                         |
| <b>Israel</b>     | <b>N Bornstein</b>     | - Chairman of the Israeli Neurological Association<br>- Shaare Zedek Medical Center, Tel Aviv University                                                                                                                                      |
|                   | <b>D Tanne</b>         | - Secretary of the Israeli Neurological Association<br>- Sheba Medical Center, Tel Aviv University                                                                                                                                            |
|                   | <b>A Horev</b>         | - Interventional radiologist, Soroka Medical Center, Beer Sheva                                                                                                                                                                               |
| <b>Italy</b>      | <b>D Toni</b>          | - President Elect of the Italian Stroke Organisation<br>- Director Emergency Department Stroke Unit, Hospital Policlinico Umberto I, Dept. of Neurology and Psychiatry, ‘Sapienza’ University, Viale del Policlinico, 155 – 00161 Rome, Italy |
|                   | <b>S Mangiafico</b>    | - Department of Neuroradiology, Careggi University Hospital, Florence                                                                                                                                                                         |
|                   | <b>V Caso</b>          | - Santa Maria della Misericordia Hospital, University of Perugia                                                                                                                                                                              |
| <b>Kyrgyzstan</b> | <b>A Murzaliyev</b>    | - President of the Kyrgyz Neurological Society<br>- Emeritus Professor at Kyrgyz State Medical Academy, Bishkek                                                                                                                               |
|                   | <b>I Lutsenko</b>      | - Secretary of the Kyrgyz Neurological Society, National Coordinator of SITS-Kyrgyzstan<br>- Faculty, Neurology Department, Faculty Kyrgyz State Medical Academy, Bishkek                                                                     |

|                   |                    |                                                                                                                                                                                                                                                                |
|-------------------|--------------------|----------------------------------------------------------------------------------------------------------------------------------------------------------------------------------------------------------------------------------------------------------------|
|                   | <b>A Artykbaev</b> | <ul style="list-style-type: none"> <li>- Kyrgyz Neurological Society, member</li> <li>- Head of angioneurological department of Bishkek city Civil Clinic 1, Bishkek</li> <li>- Chief Freelance Neurologist of Bishkek-city</li> </ul>                         |
| <b>Lithuania</b>  | <b>D Jatuzis</b>   | <ul style="list-style-type: none"> <li>- President, Lithuanian Stroke Association</li> <li>- Department of Neurology, Institute of Clinical Medicine, Faculty of Medicine, Vilnius University</li> </ul>                                                       |
|                   | <b>D Rastenyte</b> | <ul style="list-style-type: none"> <li>- Vice-President, Lithuanian Stroke Association</li> <li>- Department of Neurology, Hospital of the Lithuanian University of Health Sciences Kauno klinikos</li> </ul>                                                  |
|                   | <b>M Kurminas</b>  | <ul style="list-style-type: none"> <li>- Stroke expert, Lithuanian Stroke Association</li> <li>- Department of Radiology, Institute of Biomedicine Sciences, Faculty of Medicine, Vilnius University</li> </ul>                                                |
| <b>Latvia</b>     | <b>E Miglāne</b>   | <ul style="list-style-type: none"> <li>- President of Latvian Neurologists Association; President of Latvian Stroke Society</li> <li>- Associate Professor, P. Stradins Clinical University Hospital; Riga Stradins University</li> </ul>                      |
|                   | <b>K Kupcs</b>     | <ul style="list-style-type: none"> <li>- Board Member of Latvian Radiologists Association, Board Member of Latvian Invasive Radiology Society</li> <li>- Associate Professor, Pauls Stradins Clinical University Hospital; Riga Stradins University</li> </ul> |
|                   | <b>I Kikule</b>    | <ul style="list-style-type: none"> <li>- Board member of Latvian Stroke Society</li> <li>- Neurologist, Riga East University Hospital</li> </ul>                                                                                                               |
| <b>Luxembourg</b> | <b>D Ulbricht</b>  | <ul style="list-style-type: none"> <li>- Member of the stroke task force of the Société Luxembourgeoise de Neurologie</li> <li>- Centre de Neurologie, Centre Hospitalier Emile Mayrisch, Esch-sur-Alzette</li> </ul>                                          |
| <b>FYROM</b>      | <b>A Arsovska</b>  | <ul style="list-style-type: none"> <li>- President of Society of Neurologists of R. Macedonia</li> </ul>                                                                                                                                                       |

|                                                    |                   |                                                                                                                                                                                                                                             |
|----------------------------------------------------|-------------------|---------------------------------------------------------------------------------------------------------------------------------------------------------------------------------------------------------------------------------------------|
| <b>(The former Yugoslav Republic of Macedonia)</b> |                   | - University Clinic of Neurology, Medical Faculty, University “Ss Cyril and Methodius”, Skopje, Macedonia                                                                                                                                   |
|                                                    | <b>M Smiceska</b> | - President of Association for a fight against stroke, Macedonia<br>- Neurology Department, Special hospital Ss Erasmo                                                                                                                      |
|                                                    | <b>E Lickova</b>  | - Neurology Department, Clinical hospital, Stip                                                                                                                                                                                             |
| <b>Malta</b>                                       | <b>M Mallia</b>   | - Clinical Lead (Stroke), Maltese Neurology Association<br>- Neurology Department, Mater Dei Hospital, Msida                                                                                                                                |
|                                                    | <b>R Grech</b>    | - Consultant Neurointerventional Radiologist, Mater Dei Hospital, Malta                                                                                                                                                                     |
|                                                    | <b>M Schembri</b> | - Neurointerventional Radiologist, Mater Dei Hospital, Malta                                                                                                                                                                                |
| <b>Moldova</b>                                     | <b>V Lisnic</b>   | - President of the Society of Neurologists of the Republic of Moldova<br>- Professor at the Department of Neurology of the State Medical and Pharmaceutical University “Nicolae Testemitanu”, Chisinau, Republic of Moldova                 |
|                                                    | <b>E Manole</b>   | - Member of board of the Society of Neurologists of the Republic of Moldova<br>- Associate professor at the Department of Neurology of the State Medical and Pharmaceutical University “Nicolae Testemitanu”, Chisinau, Republic of Moldova |
|                                                    | <b>E Zota</b>     | - Member of the Neurologists Society board, Republic of Moldova<br>- Associate professor, Neurology Chair nr. 2, “Nicolae Testemitanu” State Medical and Pharmaceutical University, Chisinau, Republic of Moldova                           |



|                        |                          |                                                                                                                                                                                                                                                                  |
|------------------------|--------------------------|------------------------------------------------------------------------------------------------------------------------------------------------------------------------------------------------------------------------------------------------------------------|
| <b>Montenegro</b>      | <b>M Cukic</b>           | - Member of Montenegrin Neurology Assotiation<br>- Neurology Deparment, Clinical Centre of Montenegro, Podgorica                                                                                                                                                 |
| <b>Netherlands</b>     | <b>D Dippel</b>          | - Guideline chair, Chair of the Neurovascular section of the Dutch Neurology Society<br>- Stroke Center – Neurology, Erasmus University Medical Center, Rotterdam                                                                                                |
|                        | <b>C Majoie</b>          | - Chairman Section Neuroradiology of Dutch Society of Radiology<br>- Department of Radiology, Academic Medical Center, Amsterdam                                                                                                                                 |
|                        | <b>H. B van der Worp</b> | - Department of Neurology and Neurosurgery, Brain Center Rudolf Magnus, University Medical Center Utrecht, Utrecht, the Netherlands<br>- Member of the Dutch Neurovascular Working Group                                                                         |
| <b>Northern Cyprus</b> | <b>S Akpinar</b>         | - Interventional neuroradiologist, Burhan Nalbantoğlu state hospital, Near east University                                                                                                                                                                       |
| <b>Norway</b>          | <b>E Berge</b>           | - Leader of Stroke Research Group, Oslo University Hospital (Ullevål)<br>- Dept of Internal Medicine, Oslo University Hospital, and Institute of Clinical Medicine, University of Tromsø                                                                         |
|                        | <b>H Ellekjær</b>        | - Vice Chairman, Board of Directors, Norwegian Stroke Organization<br>- Dept of Internal Medicine, Stroke unit, University Hospital of Trondheim and Department of neuromedicine and movement science, Norwegian University of Science and Technology, Trondheim |
| <b>Poland</b>          | <b>A Czlonkowska</b>     | - Chair of the Cerebrovascular Diseases Section of Polish Neurological Society; Chair of the Working Group of the Cerebrovascular Diseases of Polish Academy of Science<br>- 2nd Department of Neurology, Institute of Psychiatry and Neurology, Warsaw          |

|                 |                       |                                                                                                                                                                                                                                                               |
|-----------------|-----------------------|---------------------------------------------------------------------------------------------------------------------------------------------------------------------------------------------------------------------------------------------------------------|
|                 | <b>W Poncyłjusz</b>   | - President of the Neurointerventional Radiology Section of the Polish Medical Society of Radiology<br>- Department of Interventional Radiology, Pomeranian Medical University, Poland                                                                        |
|                 | <b>A Kobayashi</b>    | - Interventional Neuroradiology Section of the Polish Radiological Society, Cerebrovascular Disease Section of the Polish Neurological Society<br>- Interventional Stroke and Cerebrovascular Treatment Center, Institute of Psychiatry and Neurology, Warsaw |
| <b>Portugal</b> | <b>E Azevedo</b>      | - Vice-president of the Portuguese Stroke Society<br>- Department of Neurology, São João Hospital Center and Faculty of Medicine of University of Porto                                                                                                       |
|                 | <b>V Tedim-Cruz</b>   | - Neurology Department, ULS Matosinhos, Portugal (Director); EPIUnit-ISPUP, University of Porto (Investigator)<br>- Portuguese Stroke Organisation / Sociedade Portuguesa do AVC (Secretary of the Board)                                                     |
|                 | <b>M Ribeiro</b>      | - Chief of the Interventional Radiology Unit, Neuroradiology Department, Centro Hospitalar de Vila Nova de Gaia e Espinho, Vila Nova de Gaia                                                                                                                  |
| <b>Romania</b>  | <b>C Tiu</b>          | - Elected future president of the Romanian Society of Neurology (starting 2020)<br>- University of Medicine and Pharmacy “Carol Davila”                                                                                                                       |
| <b>Russia</b>   | <b>T Kharitonova</b>  | - Saint Petersburg I.I. Dzhanelidze Research Institute of Emergency Medicine, Saint Petersburg                                                                                                                                                                |
| <b>Serbia</b>   | <b>L Bumbasirevic</b> | - The president of Committee for Neurology of Ministry of Health<br>- Faculty of Medicine, University of Belgrade. Clinical Center of Serbia, Neurology Clinic,                                                                                               |

|                 |                           |                                                                                                                                                                                                                                                             |
|-----------------|---------------------------|-------------------------------------------------------------------------------------------------------------------------------------------------------------------------------------------------------------------------------------------------------------|
|                 |                           | Belgrade                                                                                                                                                                                                                                                    |
| <b>Slovakia</b> | <b>Z Gdovinova</b>        | - Chair of Cerebrovascular section of Slovak Neurological Society<br>- Head of Department, Department of Neurology, Faculty of Medicine, P.J. Safarik University Košice                                                                                     |
|                 | <b>I Vulev</b>            | - Head of Interventional Radiology Department, National Institute of Cardiovascular Diseases, Bratislava                                                                                                                                                    |
|                 | <b>P Turcani</b>          | - Cerebrovascular section of Slovak Neurological Society, member of executive committee<br>- Comenius University Bratislava, Medical Faculty, Ist Department of Neurology                                                                                   |
| <b>Slovenia</b> | <b>B Zvan</b>             | - President of the National Stroke Society at the Slovenian Medical Association<br>- Project promoter of the national Telestroke network, University Med. Centre, Ljubljana                                                                                 |
|                 | <b>V Svigelj</b>          | - Assoc. Prof. of Neurology, former Head of NeuroICU, University Medical Centre Ljubljana, Neurology Clinic, Dept. of Vascular Neurology and Neurological Intensive Care, Ljubljana<br>- National Coordinator in Safe Implementation of Treatment in Stroke |
|                 | <b>Z Milosevic</b>        | - Head of Interventional neuroradiology, Clinical Institute of Radiology, University Med. Centre Ljubljana                                                                                                                                                  |
| <b>Spain</b>    | <b>J Gállego</b>          | - Cerebrovascular Diseases Study Group of the Spanish Society of Neurology<br>- Stroke Unit, Complejo Hospitalario de Navarra, Pamplona                                                                                                                     |
|                 | <b>M Rodríguez Yáñez</b>  | - Coordinator of the Stroke Unit. Neurology Department. Hospital Clínico Universitario de Santiago de Compostela                                                                                                                                            |
|                 | <b>E Palacio-Portilla</b> | - Department of Neurology, University Hospital Marqués de Valdecilla, Santander                                                                                                                                                                             |
|                 |                           |                                                                                                                                                                                                                                                             |

|                    |                           |                                                                                                                                                                             |
|--------------------|---------------------------|-----------------------------------------------------------------------------------------------------------------------------------------------------------------------------|
|                    | <b>A Gonzalez Mandly</b>  | - Department of Neurology, University Hospital Marqués de Valdecilla, Santander                                                                                             |
|                    | <b>M Gallofré</b>         | - Director of the Stroke Programme –Health Department of Catalonia                                                                                                          |
|                    | <b>S Abilleira</b>        | - Researcher at the Stroke Programme - Agency for Health Quality and Assessment of Catalonia                                                                                |
|                    | <b>C Jimenez</b>          | - Member of the Stroke Study Group of the Neurological Spanish Society<br>- Stroke regional contact person for The Balearic Islands, Hospital Universitario Son Espases     |
|                    | <b>S Calleja-Puerta</b>   | - Stroke Unit, Department of Neurology, Hospital Universitario Central de Asturias , Oviedo                                                                                 |
|                    | <b>J Marta-Moreno</b>     | - Aragón Stroke Programme Medical Coordinator<br>- Neurovascular Unit, Hospital Universitario Miguel Servet, Zaragoza, Spain                                                |
|                    | <b>M Óscar Ayo-Martin</b> | Stroke Unit Medical Coordinator, Neurology Department, Complejo Hospitalario Universitario de Albacete, Associate Professor of Neurology, Universidad de Castilla-La Mancha |
|                    | <b>A Lago</b>             | - Stroke Unit, Hospital Universitario y Politécnico de La Fe                                                                                                                |
| <b>Switzerland</b> | <b>M Arnold</b>           | - President, Swiss Stroke Society<br>- Chairman Stroke Center, University Hospital Bern                                                                                     |
| <b>Sweden</b>      | <b>M Mazya</b>            | - Chair, Swedish Acute Neurology Society<br>- Dept. of Neurology, Karolinska University Hospital, Stockholm Sweden                                                          |
|                    | <b>T Moreira</b>          | - Regular member of the ANS – Acute Neurology in Sweden<br>- Neurosection, Dept Clin Neuroscience, Karolinska University Hospital, Stockholm                                |
| <b>Turkey</b>      | <b>N Uzuner</b>           | - President of the Turkish Cerebrovascular Disease Society<br>- Director of Neurosonology unit and Head of Cerebrovascular Disease Department, Department of                |

|                       |                    |                                                                                                                                                                                                                                                                |
|-----------------------|--------------------|----------------------------------------------------------------------------------------------------------------------------------------------------------------------------------------------------------------------------------------------------------------|
|                       |                    | Neurology, Eskisehir Osmangazi University                                                                                                                                                                                                                      |
|                       | <b>L Gungor</b>    | - Member of Turkish Cerebrovascular Diseases Society<br>- Assoc. Prof. of Neurology, Ondokuz Mayıs University Medical Faculty, Samsun                                                                                                                          |
|                       | <b>O Ozdemir</b>   | - Chair of the Interventional Neurology in Turkish Neurological Society<br>- Head of Intensive Care Department, Prof. of Neurology, Head of Intensive Care Department, MD, Prof. of Neurology, Eskisehir                                                       |
| <b>United Kingdom</b> | <b>H Rodgers</b>   | - President, British Association of Stroke Physicians<br>- Professor of Stroke Care, Institute of Neuroscience and Newcastle University Institute for Ageing                                                                                                   |
|                       | <b>J Dawson</b>    | - Scottish representative on executive, member, British Association of Stroke Physicians<br>- Clinical Lead Scottish Stroke Research Network / NRS Stroke Research Champion                                                                                    |
|                       | <b>P White</b>     | - UK Neurointerventional Group Secretary<br>- Institute of Neuroscience Newcastle University                                                                                                                                                                   |
| <b>Ukraine</b>        | <b>Y Flomin</b>    | - Board member, Ukrainian Anti-Stroke Association<br>- Medical Center 'Universal Clinic «Oberig»', Kyiv, Ukraine                                                                                                                                               |
|                       | <b>D Shcheglov</b> | - Head of Non-Governmental Organization “Allukrainian Association of Endovascular Neuroradiology”;<br>- Member of the Ukrainian Association for the Stroke<br>- Director of SO “Scientific-Practical Center of endovascular neuroradiology of NAMS of Ukraine” |

**Appendix 2**  
**Questionnaire**

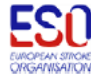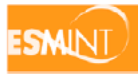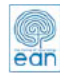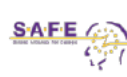

## ESO/ ESMINT/ EAN / SAFE Survey on Endovascular Therapy for Ischaemic Stroke

### I. National

1.

|                                                                                                                                                                                                                                                                                                                 |                                                                                                 |                                                                  |                                                                                                                                                                                                         |
|-----------------------------------------------------------------------------------------------------------------------------------------------------------------------------------------------------------------------------------------------------------------------------------------------------------------|-------------------------------------------------------------------------------------------------|------------------------------------------------------------------|---------------------------------------------------------------------------------------------------------------------------------------------------------------------------------------------------------|
| <b>Name</b> ( <i>Last, First</i> ):                                                                                                                                                                                                                                                                             |                                                                                                 | <input type="checkbox"/> M <input checked="" type="checkbox"/> F | <b>Date:</b>                                                                                                                                                                                            |
| <b>Career level:</b>                                                                                                                                                                                                                                                                                            | <input type="checkbox"/> Senior Physician<br><input type="checkbox"/> Chief/Chair of Department | <b>Specialization:</b>                                           | <input type="checkbox"/> General neurologist<br><input type="checkbox"/> Stroke physician<br><input type="checkbox"/> General /Neuro radiologist<br><input type="checkbox"/> Interventional radiologist |
| <b>e-mail :</b>                                                                                                                                                                                                                                                                                                 |                                                                                                 |                                                                  |                                                                                                                                                                                                         |
| <b>Current Position in European Stroke/Neurology organization:</b> <input checked="" type="checkbox"/> Yes <input type="checkbox"/> No<br>If yes, please indicate organization: <input type="checkbox"/> ESO <input type="checkbox"/> ESMINT <input type="checkbox"/> EAN <input type="checkbox"/> Other: _____ |                                                                                                 |                                                                  |                                                                                                                                                                                                         |
| <b>Current position in national Stroke/Neurology organization:</b>                                                                                                                                                                                                                                              |                                                                                                 |                                                                  |                                                                                                                                                                                                         |
| <b>Affiliation</b>                                                                                                                                                                                                                                                                                              |                                                                                                 |                                                                  |                                                                                                                                                                                                         |
| <b>Institution</b>                                                                                                                                                                                                                                                                                              |                                                                                                 |                                                                  |                                                                                                                                                                                                         |
| <b>City</b>                                                                                                                                                                                                                                                                                                     |                                                                                                 | <b>Country</b>                                                   |                                                                                                                                                                                                         |

2.

|                                                                                                                                                                                                                                                                                                      |                                                                                                 |                                                                  |                                                                                                                                                                                                         |
|------------------------------------------------------------------------------------------------------------------------------------------------------------------------------------------------------------------------------------------------------------------------------------------------------|-------------------------------------------------------------------------------------------------|------------------------------------------------------------------|---------------------------------------------------------------------------------------------------------------------------------------------------------------------------------------------------------|
| <b>Name</b> ( <i>Last, First</i> ):                                                                                                                                                                                                                                                                  |                                                                                                 | <input checked="" type="checkbox"/> M <input type="checkbox"/> F | <b>Date:</b>                                                                                                                                                                                            |
| <b>Career level:</b>                                                                                                                                                                                                                                                                                 | <input type="checkbox"/> Senior Physician<br><input type="checkbox"/> Chief/Chair of Department | <b>Specialization:</b>                                           | <input type="checkbox"/> General neurologist<br><input type="checkbox"/> Stroke physician<br><input type="checkbox"/> General /Neuro radiologist<br><input type="checkbox"/> Interventional radiologist |
| <b>e-mail :</b>                                                                                                                                                                                                                                                                                      |                                                                                                 |                                                                  |                                                                                                                                                                                                         |
| <b>Current Position in European Stroke/Neurology organization:</b> <input type="checkbox"/> Yes <input type="checkbox"/> No<br>If yes, please indicate organization: <input type="checkbox"/> ESO <input type="checkbox"/> ESMINT <input type="checkbox"/> EAN <input type="checkbox"/> Other: _____ |                                                                                                 |                                                                  |                                                                                                                                                                                                         |
| <b>Current position in national Stroke/Neurology organization:</b>                                                                                                                                                                                                                                   |                                                                                                 |                                                                  |                                                                                                                                                                                                         |
| <b>Affiliation</b>                                                                                                                                                                                                                                                                                   |                                                                                                 |                                                                  |                                                                                                                                                                                                         |
| <b>Institution</b>                                                                                                                                                                                                                                                                                   |                                                                                                 |                                                                  |                                                                                                                                                                                                         |
| <b>City</b>                                                                                                                                                                                                                                                                                          |                                                                                                 | <b>Country</b>                                                   |                                                                                                                                                                                                         |

3.

|                                                                                                                                                                                                                                                                                                      |                                                                                                 |                                                       |                                                                                                                                                                                                         |
|------------------------------------------------------------------------------------------------------------------------------------------------------------------------------------------------------------------------------------------------------------------------------------------------------|-------------------------------------------------------------------------------------------------|-------------------------------------------------------|---------------------------------------------------------------------------------------------------------------------------------------------------------------------------------------------------------|
| <b>Name</b> ( <i>Last, First</i> ):                                                                                                                                                                                                                                                                  |                                                                                                 | <input type="checkbox"/> M <input type="checkbox"/> F | <b>Date:</b>                                                                                                                                                                                            |
| <b>Career level:</b>                                                                                                                                                                                                                                                                                 | <input type="checkbox"/> Senior Physician<br><input type="checkbox"/> Chief/Chair of Department | <b>Specialization:</b>                                | <input type="checkbox"/> General neurologist<br><input type="checkbox"/> Stroke physician<br><input type="checkbox"/> General /Neuro radiologist<br><input type="checkbox"/> Interventional radiologist |
| <b>e-mail :</b>                                                                                                                                                                                                                                                                                      |                                                                                                 |                                                       |                                                                                                                                                                                                         |
| <b>Current Position in European Stroke/Neurology organization:</b> <input type="checkbox"/> Yes <input type="checkbox"/> No<br>If yes, please indicate organization: <input type="checkbox"/> ESO <input type="checkbox"/> ESMINT <input type="checkbox"/> EAN <input type="checkbox"/> Other: _____ |                                                                                                 |                                                       |                                                                                                                                                                                                         |
| <b>Current position in national Stroke/Neurology organization:</b>                                                                                                                                                                                                                                   |                                                                                                 |                                                       |                                                                                                                                                                                                         |
| <b>Affiliation</b>                                                                                                                                                                                                                                                                                   |                                                                                                 |                                                       |                                                                                                                                                                                                         |
| <b>Institution</b>                                                                                                                                                                                                                                                                                   |                                                                                                 |                                                       |                                                                                                                                                                                                         |
| <b>City</b>                                                                                                                                                                                                                                                                                          |                                                                                                 | <b>Country</b>                                        |                                                                                                                                                                                                         |

**REPRESENTATION:**

|                                                |
|------------------------------------------------|
| <b>Name of the country you represent</b>       |
| <b>Population of the country you represent</b> |

| <b>PART 1. ORGANISATION OF (ACUTE) STROKE SYSTEMS OF CARE</b>                                                                                                                                                                                                                   |                                                                                                                                                                                                                                                                                           |
|---------------------------------------------------------------------------------------------------------------------------------------------------------------------------------------------------------------------------------------------------------------------------------|-------------------------------------------------------------------------------------------------------------------------------------------------------------------------------------------------------------------------------------------------------------------------------------------|
| <b>NATIONAL LEVEL</b>                                                                                                                                                                                                                                                           |                                                                                                                                                                                                                                                                                           |
| <b>Please indicate the estimated annual number of incident ischaemic strokes in your country?</b> (Latest estimate available) _____<br>Year: _____                                                                                                                              |                                                                                                                                                                                                                                                                                           |
| Please indicate annual number incident strokes (all types) if data for ischaemic stroke is lacking<br>_____<br><input type="checkbox"/> National registries<br><input type="checkbox"/> Extrapolation of local numbers to national level<br><input type="checkbox"/> Estimation |                                                                                                                                                                                                                                                                                           |
| <b>Is this information based on registries or estimates?</b>                                                                                                                                                                                                                    |                                                                                                                                                                                                                                                                                           |
| <b>Please indicate the source of the mentioned data</b> _____                                                                                                                                                                                                                   |                                                                                                                                                                                                                                                                                           |
| <b>How many patients with acute ischaemic stroke are admitted in your country annually?</b> (Please indicate approximate number or write unknown) _____                                                                                                                         |                                                                                                                                                                                                                                                                                           |
| <b>In your country, is there an established/defined plan/programme/strategy to address stroke care recommendations?</b>                                                                                                                                                         | <input type="checkbox"/> Yes<br><input type="checkbox"/> No<br><input type="checkbox"/> Unknown                                                                                                                                                                                           |
| <b>The stroke plan/program/strategy operates at what level?</b><br>(Tick as many as apply)                                                                                                                                                                                      | <input type="checkbox"/> Country-wide<br><input type="checkbox"/> Region-wide<br><input type="checkbox"/> Local<br><input type="checkbox"/> Other _____                                                                                                                                   |
| <b>Duties of the Stroke Programme/ Strategy in your country</b><br>(Tick as many as apply)                                                                                                                                                                                      | <input type="checkbox"/> Health planning (stroke priorities) <input type="checkbox"/> Quality of stroke care assessment/ improvement <input type="checkbox"/> Hospitals' reimbursement                                                                                                    |
|                                                                                                                                                                                                                                                                                 | <input type="checkbox"/> Implementation/ organisation of stroke systems of (acute) care <input type="checkbox"/> Design and/or parameterisation of stroke registries and/or registry data analysis <input type="checkbox"/> Community education                                           |
|                                                                                                                                                                                                                                                                                 | <input type="checkbox"/> Emergency medical service / stroke physicians' liaison <input type="checkbox"/> Cost of stroke care analysis <input type="checkbox"/> Professionals' education                                                                                                   |
| <b>In your country, is there an established/defined acute stroke care pathway (including the Emergency Medical System)?</b>                                                                                                                                                     | <input type="checkbox"/> Yes <input type="checkbox"/> Planned<br><input type="checkbox"/> No <input type="checkbox"/> Unknown                                                                                                                                                             |
| <b>What does the acute stroke care pathway in your country cover?</b> (Tick as many as apply)                                                                                                                                                                                   | <input type="checkbox"/> Stroke prevention<br><input type="checkbox"/> Emergency admission<br><input type="checkbox"/> Acute hospital care<br><input type="checkbox"/> Neurorehabilitation<br><input type="checkbox"/> Post stroke care<br><input type="checkbox"/> Other, specify: _____ |
| <b>Which guidelines are implemented in your country?</b> (Tick as many as apply)                                                                                                                                                                                                | <input type="checkbox"/> ESO <input type="checkbox"/> AHA/Stroke <input type="checkbox"/> National <input type="checkbox"/> Others <input type="checkbox"/> None                                                                                                                          |
| <b>How many Hospitals in your country admit patients with acute stroke?</b>                                                                                                                                                                                                     | Please indicate the number _____<br><input type="checkbox"/> Unknown                                                                                                                                                                                                                      |
| <b>How many stroke units are available in your country?</b>                                                                                                                                                                                                                     | Please indicate the number _____<br><input type="checkbox"/> Unknown                                                                                                                                                                                                                      |
| <b>Do you have national requirements for stroke units?</b>                                                                                                                                                                                                                      | <input type="checkbox"/> Yes <input type="checkbox"/> Planned<br><input type="checkbox"/> No <input type="checkbox"/> Unknown                                                                                                                                                             |
| <b>Are you currently running a certification program for stroke units?</b>                                                                                                                                                                                                      | <input type="checkbox"/> Yes <input type="checkbox"/> Planned<br><input type="checkbox"/> No <input type="checkbox"/> Unknown                                                                                                                                                             |
| <b>Is the healthcare system in your country public (paid via taxation or compulsory health care insurance) or private (private health insurance)?</b>                                                                                                                           | <input type="checkbox"/> Public    % _____<br><input type="checkbox"/> Private    % _____                                                                                                                                                                                                 |
| <b>Which specific stroke therapies are reimbursed (the hospital receives payment for) in your country?</b>                                                                                                                                                                      | <input type="checkbox"/> Stroke unit <input type="checkbox"/> EVT (endovascular treatment)<br><input type="checkbox"/> iv rtPA <input type="checkbox"/> Unknown                                                                                                                           |
| <b>If the costs of the EVT are currently not reimbursed at a Governmental level (in public healthcare based systems) are there plans for this to change?</b>                                                                                                                    | <input type="checkbox"/> Yes <input type="checkbox"/> Does not apply<br><input type="checkbox"/> No <input type="checkbox"/> Unknown                                                                                                                                                      |
| <b>Is stroke care treatment organized on regional level?</b>                                                                                                                                                                                                                    | <input type="checkbox"/> Yes <input type="checkbox"/> No                                                                                                                                                                                                                                  |
| <b>If stroke care is organized on a regional level, how many different areas do you have?</b>                                                                                                                                                                                   | Yes: number of regions _____                                                                                                                                                                                                                                                              |
| <b>Are there major differences in stroke care among the different regions?</b>                                                                                                                                                                                                  | <input type="checkbox"/> Yes <input type="checkbox"/> No                                                                                                                                                                                                                                  |
| <b>Is EVT still unavailable in any region?</b>                                                                                                                                                                                                                                  | <input type="checkbox"/> Yes <input type="checkbox"/> No                                                                                                                                                                                                                                  |



| PART 2. PRE-HOSPITAL CARE                                                                                                                                                                                                                         |                                                                                                                                                                                                                                                                                                                                                                                     |
|---------------------------------------------------------------------------------------------------------------------------------------------------------------------------------------------------------------------------------------------------|-------------------------------------------------------------------------------------------------------------------------------------------------------------------------------------------------------------------------------------------------------------------------------------------------------------------------------------------------------------------------------------|
| NATIONAL LEVEL                                                                                                                                                                                                                                    |                                                                                                                                                                                                                                                                                                                                                                                     |
| What type of ambulance is generally dispatched to attend patients with suspicion of acute stroke? <i>(Tick as many as apply)</i>                                                                                                                  | <input type="checkbox"/> Medicalised (doctor)<br><input type="checkbox"/> Non-medicalised (Nurse or paramedic)                                                                                                                                                                                                                                                                      |
| Do EMS (emergency medicine services) ambulances have strict orders to transfer acute stroke patients to hospitals providing IVT?                                                                                                                  | <input type="checkbox"/> Yes <input type="checkbox"/> No <input type="checkbox"/> Unknown                                                                                                                                                                                                                                                                                           |
| Is there an official/public instruction (document) describing the Stroke Protocol for the EMS operating in your country/region?                                                                                                                   | <input type="checkbox"/> Yes <input type="checkbox"/> No <input type="checkbox"/> Unknown                                                                                                                                                                                                                                                                                           |
| If you answered yes to the prior question, is your Stroke Protocol activated whenever stroke is suspected or does it have any limitations regarding<br>(Please describe criteria used)                                                            | Age?<br><input type="checkbox"/> Yes _____ <input type="checkbox"/> No<br>Time from stroke onset?<br><input type="checkbox"/> Yes _____ <input type="checkbox"/> No<br><input type="checkbox"/> Concomitant diseases?<br><input type="checkbox"/> Yes _____ <input type="checkbox"/> No<br>Pre-stroke disability?<br><input type="checkbox"/> Yes _____ <input type="checkbox"/> No |
| Does your Stroke Protocol apply a "by-pass local hospital" policy according to stroke patient's baseline features (i.e. are patients with suspected large vessel occlusion directly brought to the next hospital providing endovascular therapy)? | <input type="checkbox"/> Yes <input type="checkbox"/> No                                                                                                                                                                                                                                                                                                                            |
| Do you have STEMO-like mobile stroke units on the field (with portable CT and a stroke physician)?                                                                                                                                                | <input type="checkbox"/> Yes, covering _____% of pop.<br><input type="checkbox"/> No                                                                                                                                                                                                                                                                                                |

| PART 3. SPECIFIC STROKE TREATMENT                                                                                                                                                                     |                                                                                                                                                                                                                                                                                                                                                                                                                                                                     |
|-------------------------------------------------------------------------------------------------------------------------------------------------------------------------------------------------------|---------------------------------------------------------------------------------------------------------------------------------------------------------------------------------------------------------------------------------------------------------------------------------------------------------------------------------------------------------------------------------------------------------------------------------------------------------------------|
| NATIONAL LEVEL                                                                                                                                                                                        |                                                                                                                                                                                                                                                                                                                                                                                                                                                                     |
| Is intravenous thrombolysis available in your country?                                                                                                                                                | <input type="checkbox"/> Yes and broadly used<br><input type="checkbox"/> Yes, but only for a subset of eligible patients (e.g. private insurance)<br><input type="checkbox"/> Yes, but not widely available<br><input type="checkbox"/> No<br><input type="checkbox"/> Other: _____                                                                                                                                                                                |
| What is the estimated number of iv thrombolysis per year in your country? Please indicate the number and corresponding year                                                                           | No. of IV thrombolysis _____<br>Year of the estimate: _____                                                                                                                                                                                                                                                                                                                                                                                                         |
| How many centres offer intravenous thrombolytic therapy for ischaemic stroke in your country? Please indicate the number                                                                              | _____<br><input type="checkbox"/> Unknown                                                                                                                                                                                                                                                                                                                                                                                                                           |
| If not widely available, what are the reasons for not receiving intravenous thrombolysis in your country? Please select all options that apply                                                        | <input type="checkbox"/> Most patients with late arrival at hospital<br><input type="checkbox"/> Brain imaging not available<br><input type="checkbox"/> Other missing facilities, please specify _____<br><input type="checkbox"/> lack of stroke expertise on site<br><input type="checkbox"/> Medication is not approved in the country<br><input type="checkbox"/> Costs<br><input type="checkbox"/> Insurance reasons<br><input type="checkbox"/> Other: _____ |
| Do you have access to endovascular stroke therapy in your country?                                                                                                                                    | <input type="checkbox"/> Yes <input type="checkbox"/> Planned<br><input type="checkbox"/> No <input type="checkbox"/> Unknown                                                                                                                                                                                                                                                                                                                                       |
| How many centres do perform endovascular stroke therapy in your country? Please indicate the number                                                                                                   | _____<br><input type="checkbox"/> Unknown                                                                                                                                                                                                                                                                                                                                                                                                                           |
| Is endovascular stroke therapy available 24h a day/ 7 days per week?                                                                                                                                  | <input type="checkbox"/> Yes, please indicate number _____ and % _____ of centres<br><input type="checkbox"/> Planned <input type="checkbox"/> No <input type="checkbox"/> Unknown                                                                                                                                                                                                                                                                                  |
| What is the estimated proportion of patients with acute ischaemic stroke in your country that have around-the-clock access to endovascular stroke treatment? Please indicate the estimated proportion | _____%<br><input type="checkbox"/> Unknown                                                                                                                                                                                                                                                                                                                                                                                                                          |
| Do the available centres cover the need for endovascular stroke therapy in your country?                                                                                                              | <input type="checkbox"/> Yes <input type="checkbox"/> Planned<br><input type="checkbox"/> No <input type="checkbox"/> Unknown                                                                                                                                                                                                                                                                                                                                       |



|                                                                                                                                                                     |                                                                                                                                                                                                                                                                                                                                                                                                                                                                                                                                                                                         |
|---------------------------------------------------------------------------------------------------------------------------------------------------------------------|-----------------------------------------------------------------------------------------------------------------------------------------------------------------------------------------------------------------------------------------------------------------------------------------------------------------------------------------------------------------------------------------------------------------------------------------------------------------------------------------------------------------------------------------------------------------------------------------|
| <p><b>If yes, select which data can be derived from your registry</b><br/>(Please tick all that apply)</p>                                                          | <input type="checkbox"/> N. of acute stroke patients assessed<br><input type="checkbox"/> Subtypes of stroke<br><input type="checkbox"/> N. of thrombolysis<br><input type="checkbox"/> N. of EVT<br><input type="checkbox"/> Door to needle time<br><input type="checkbox"/> Door to puncture time<br><input type="checkbox"/> Door-to-recanalization time<br><input type="checkbox"/> Recanalization rate<br><input type="checkbox"/> Stroke outcome at discharge<br><input type="checkbox"/> Stroke outcome at 90 days<br><input type="checkbox"/> Stroke outcome at other date_____ |
| <p><b>In your country, does the Health Administration apply any "pay for performance" strategy that is based on performance measures for acute stroke care?</b></p> | <input type="checkbox"/> Yes <input type="checkbox"/> Planned<br><input type="checkbox"/> No <input type="checkbox"/> Unknown                                                                                                                                                                                                                                                                                                                                                                                                                                                           |

**PART 5. STROKE AWARENESS CAMPAIGNS**

**NATIONAL LEVEL**

|                                                                                                              |                                                                                                                                                                                                                                                                                                                                                  |
|--------------------------------------------------------------------------------------------------------------|--------------------------------------------------------------------------------------------------------------------------------------------------------------------------------------------------------------------------------------------------------------------------------------------------------------------------------------------------|
| <p><b>Do you have regular public stroke awareness campaigns in your country?</b></p>                         | <input type="checkbox"/> Yes <input type="checkbox"/> Planned<br><input type="checkbox"/> No <input type="checkbox"/> Unknown                                                                                                                                                                                                                    |
| <p><b>If yes, at what level?</b></p>                                                                         | <input type="checkbox"/> Primary Care <input type="checkbox"/> Pharmacies<br><input type="checkbox"/> TV <input type="checkbox"/> Radio<br><input type="checkbox"/> Posters <input type="checkbox"/> Newspapers<br><input type="checkbox"/> Other<br>(specify)_____ <input type="checkbox"/> Internet<br><input type="checkbox"/> Primary school |
| <p><b>Which tools are used for dissemination of knowledge about stroke? (Please tick all that apply)</b></p> | <input type="checkbox"/> Ads (TV, radio) <input type="checkbox"/> Posters<br><input type="checkbox"/> Handouts <input type="checkbox"/><br>Other_____                                                                                                                                                                                            |
| <p><b>Is the impact of stroke awareness campaigns assessed in any way?</b></p>                               | <input type="checkbox"/> Yes <input type="checkbox"/> Planned<br><input type="checkbox"/> No <input type="checkbox"/> Unknown                                                                                                                                                                                                                    |

## Appendix 3 – Supplementary figures and tables

### Supplementary figures

Figure 1: Geographical coverage of the ESO ESMINT EAN SAFE survey on stroke care in Europe

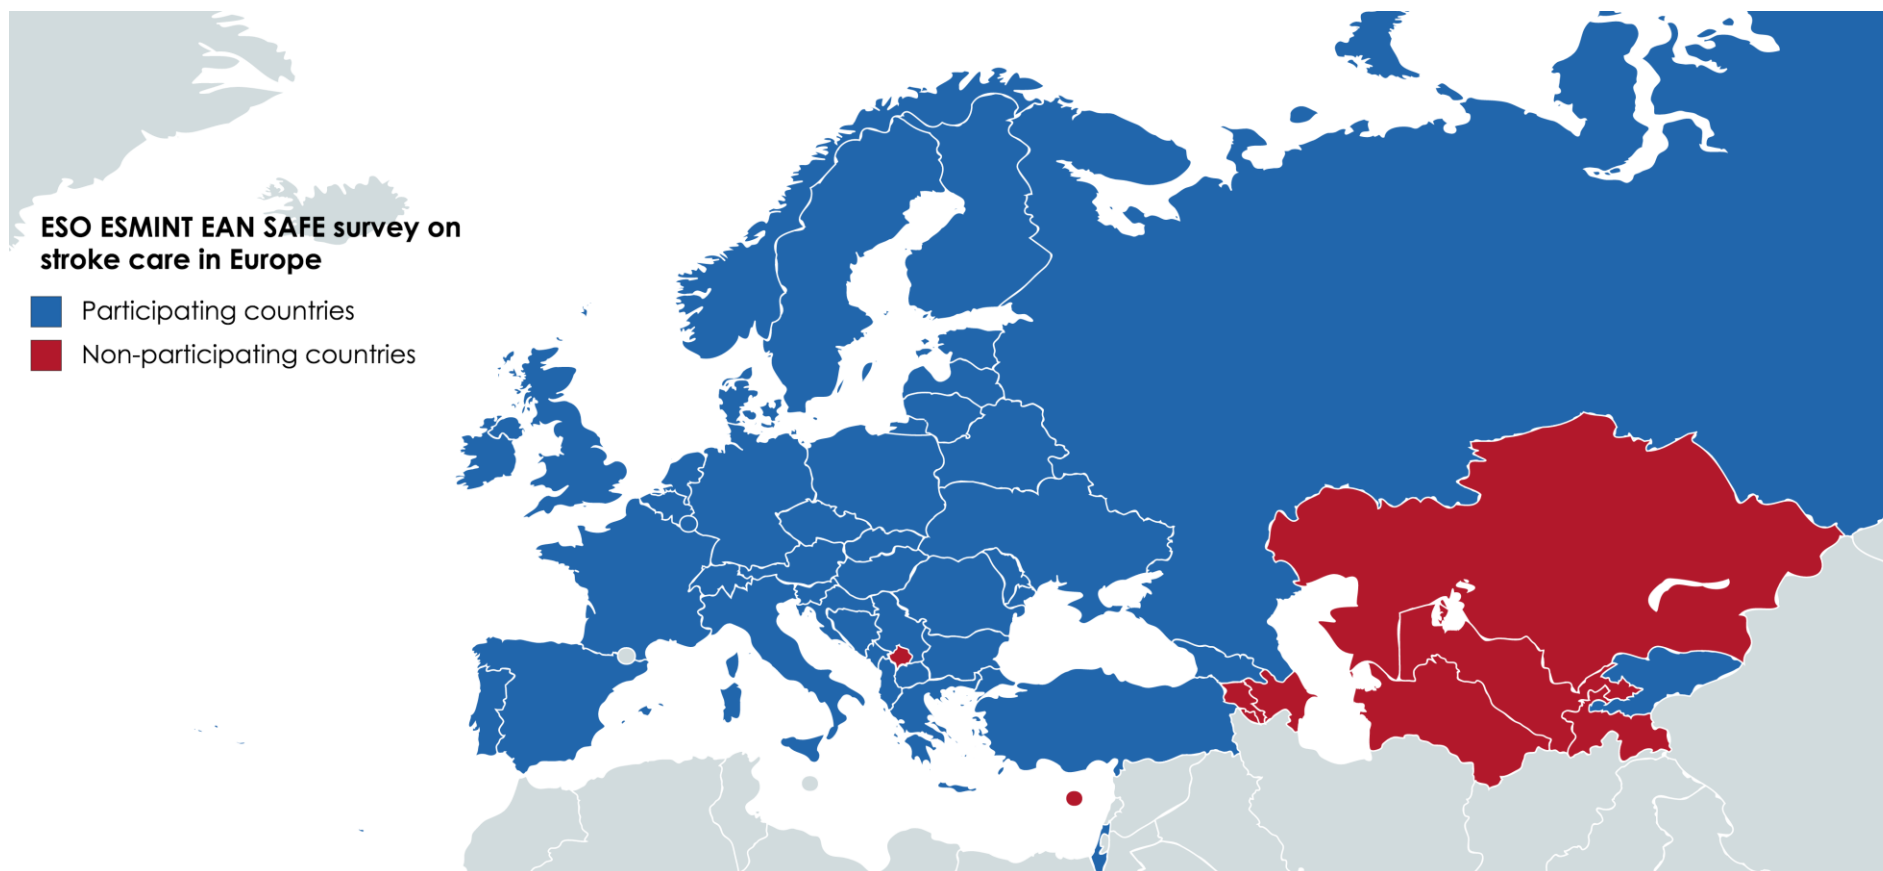

Figure 2: Countries with established national requirements for stroke units

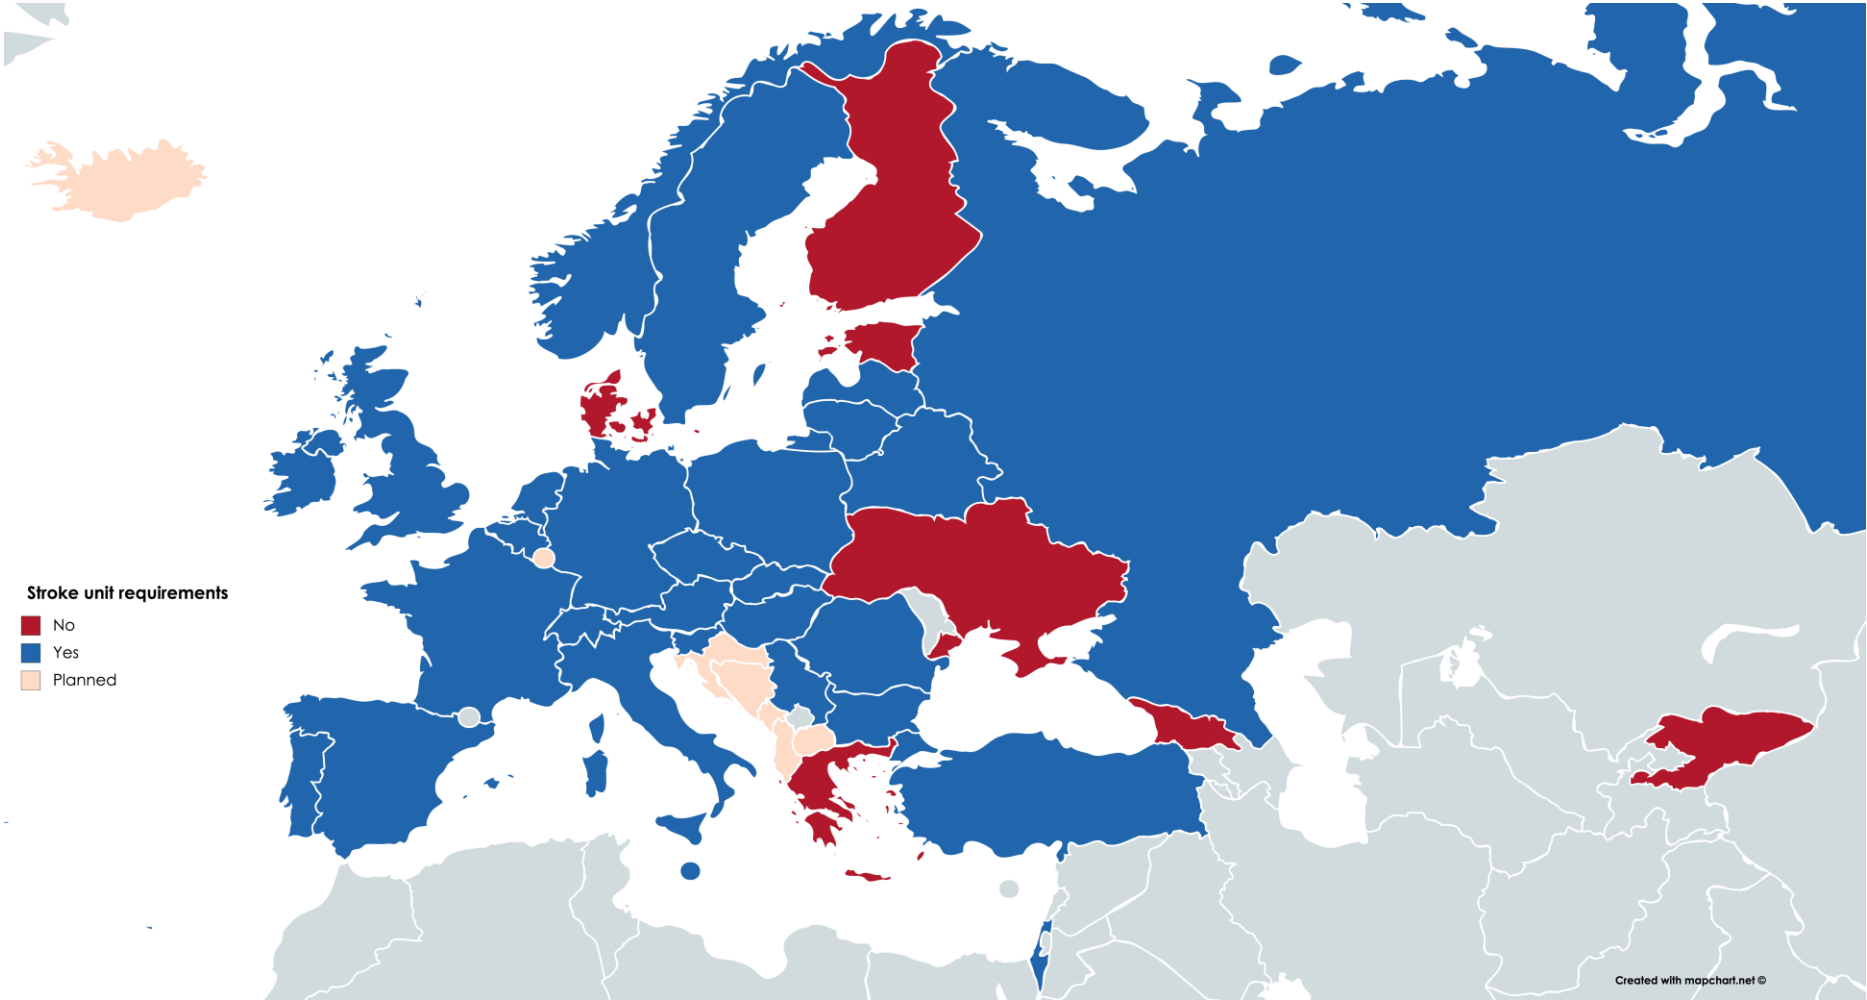

**Figure 3: Number of stroke units per million population in 42 European countries**

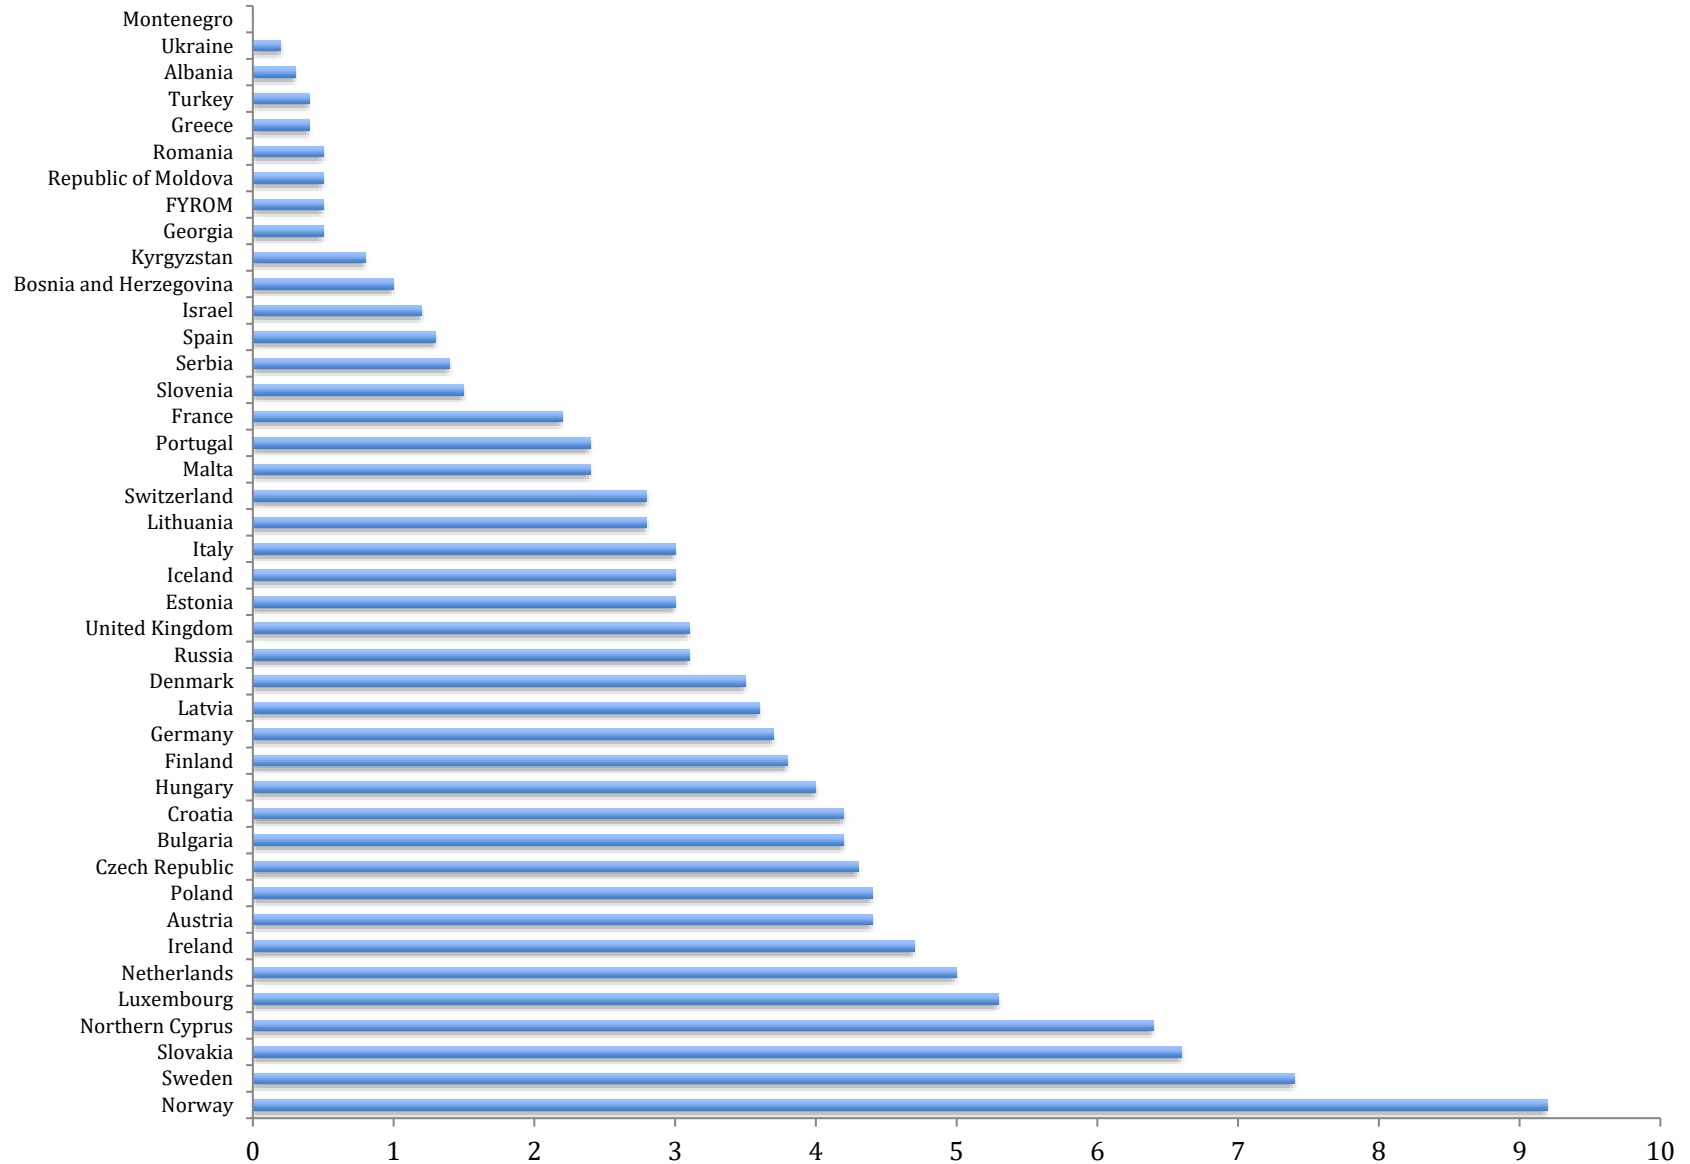

FYROM, Former Yugoslav Republic of Macedonia.

**Figure 4: Contemporary annual rates of intravenous thrombolysis (IVT) per million population in 42 European countries**

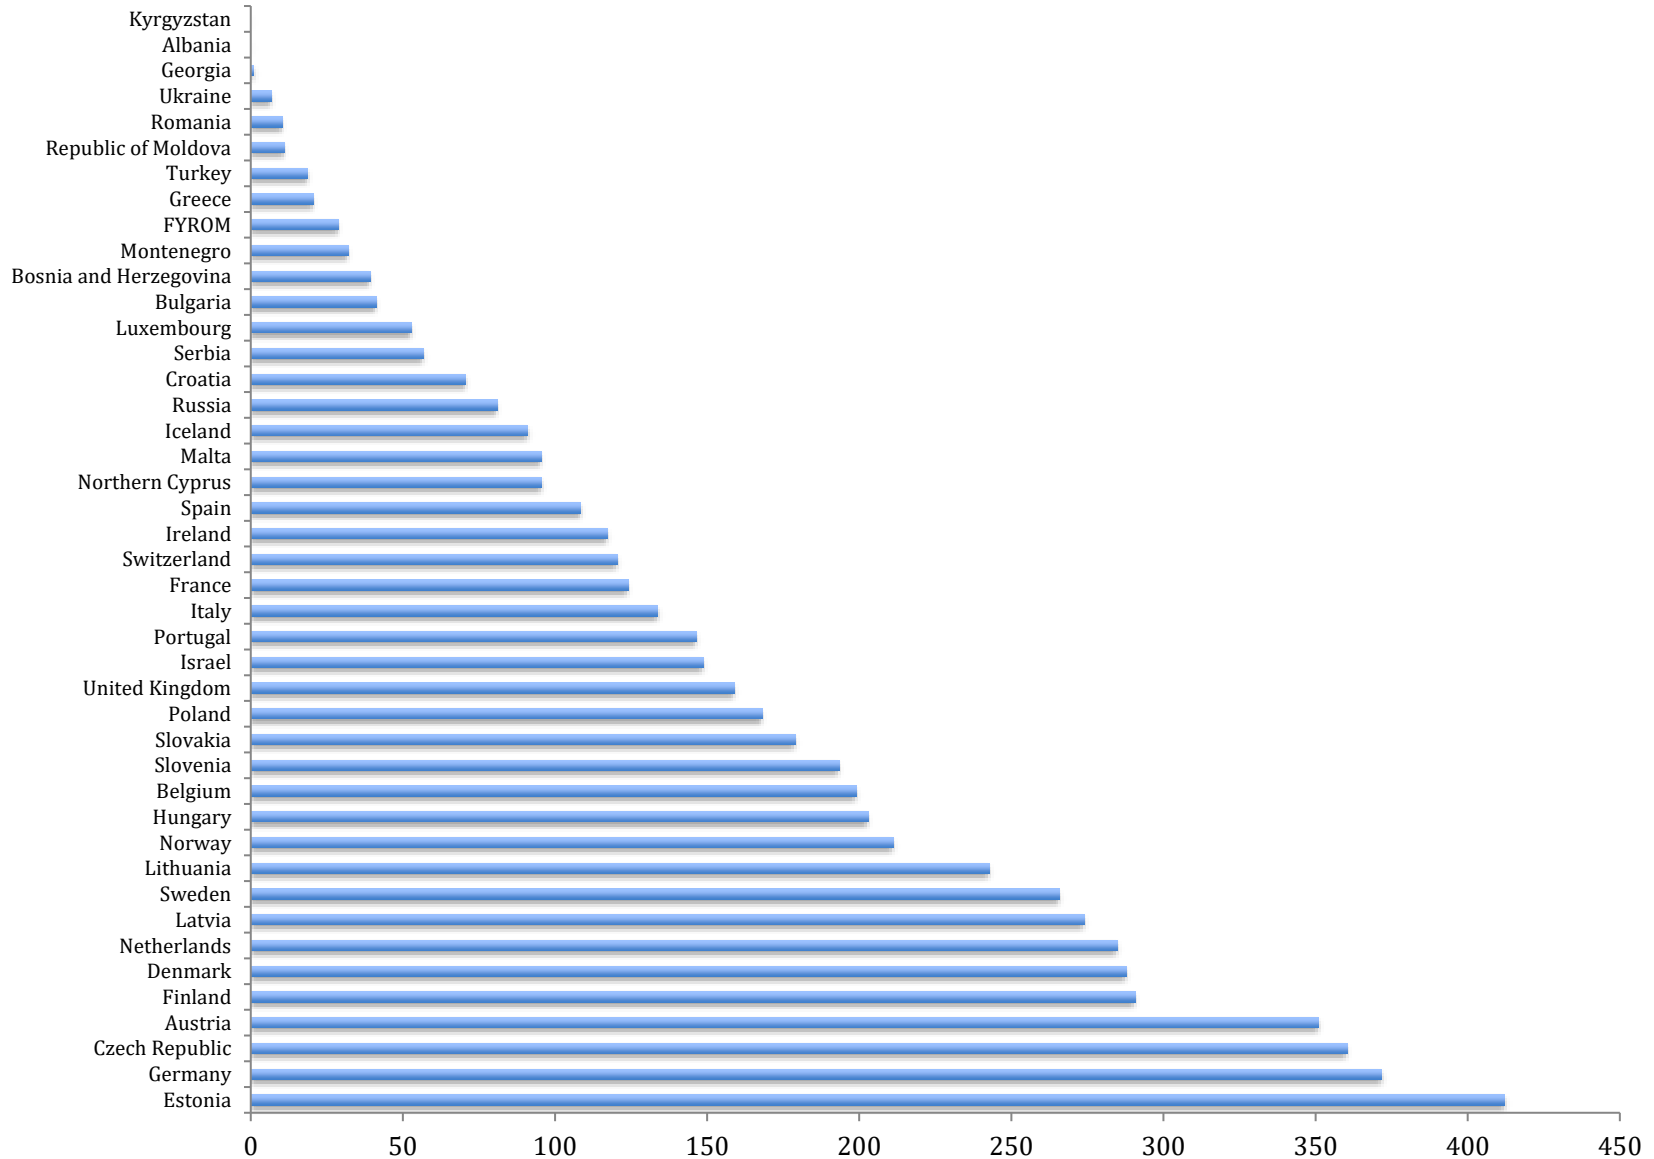

FYROM, Former Yugoslav Republic of Macedonia.

**Figure 5: Contemporary annual rates of endovascular treatments (EVT) for ischaemic stroke per million population in 43 European countries**

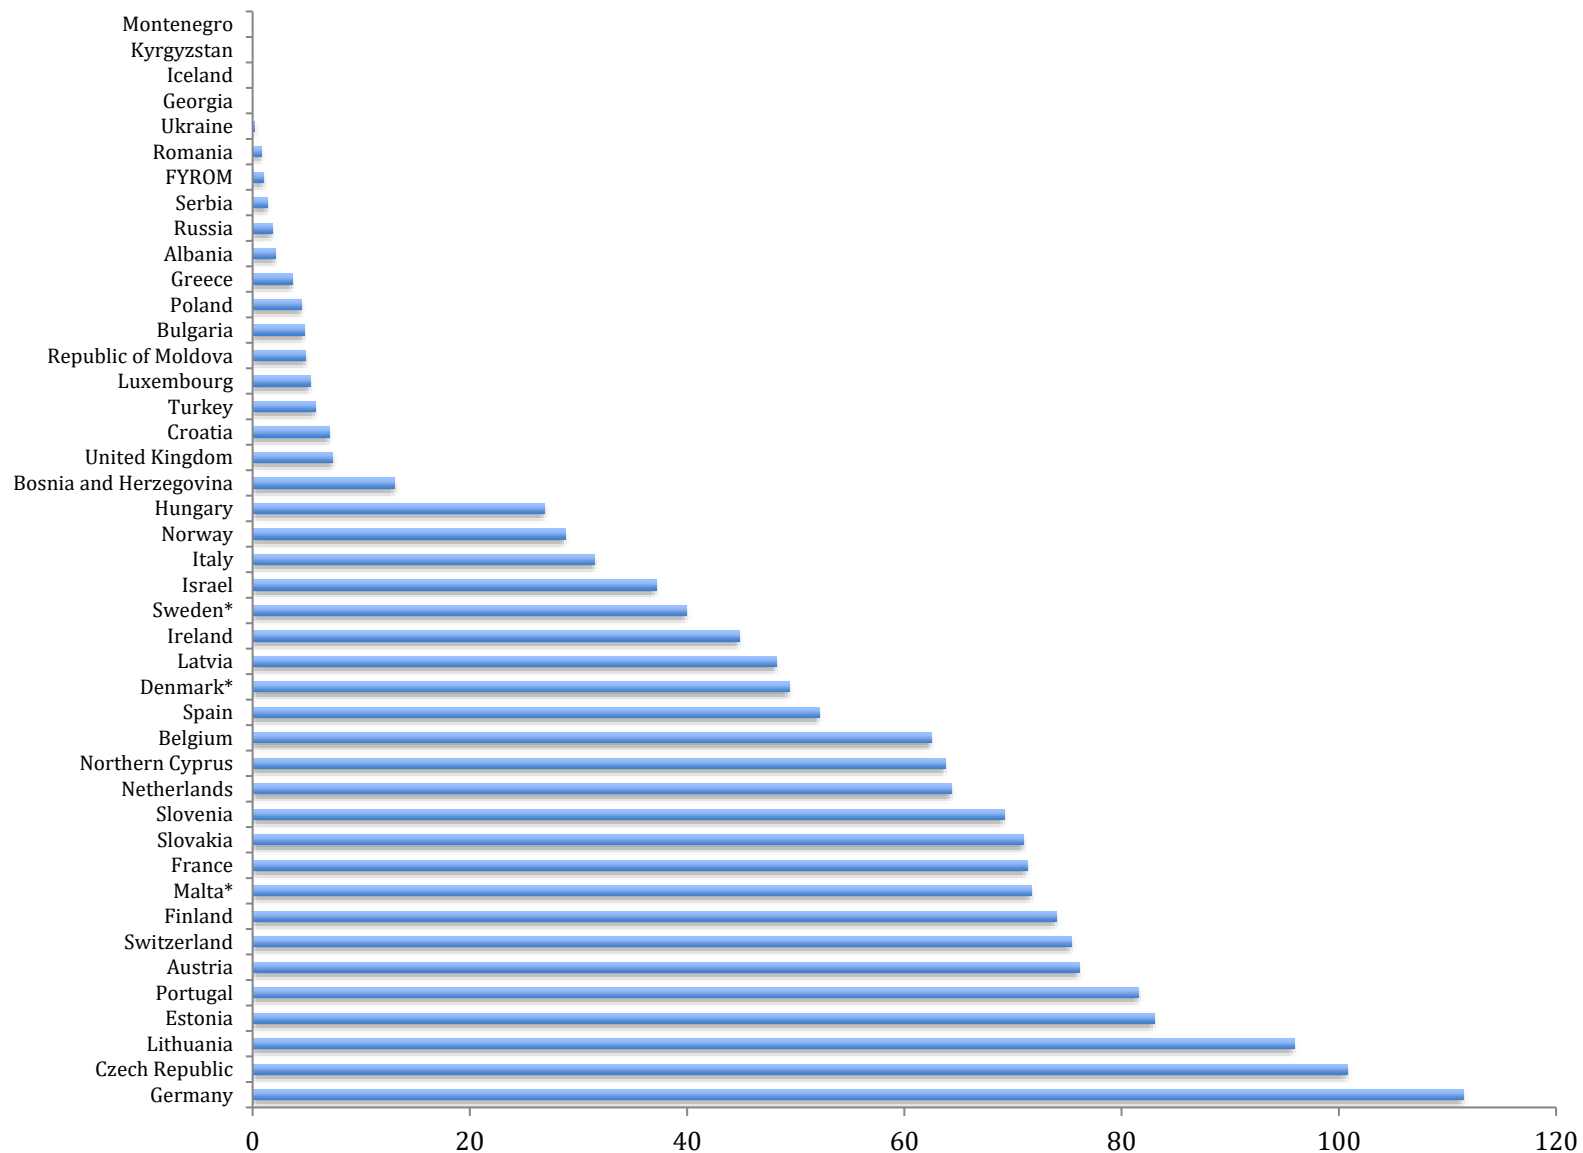

\*2015

FYROM, Former Yugoslav Republic of Macedonia.



**Figure 6: Number of stroke units per 1000 annual incident ischaemic strokes in 42 European countries**

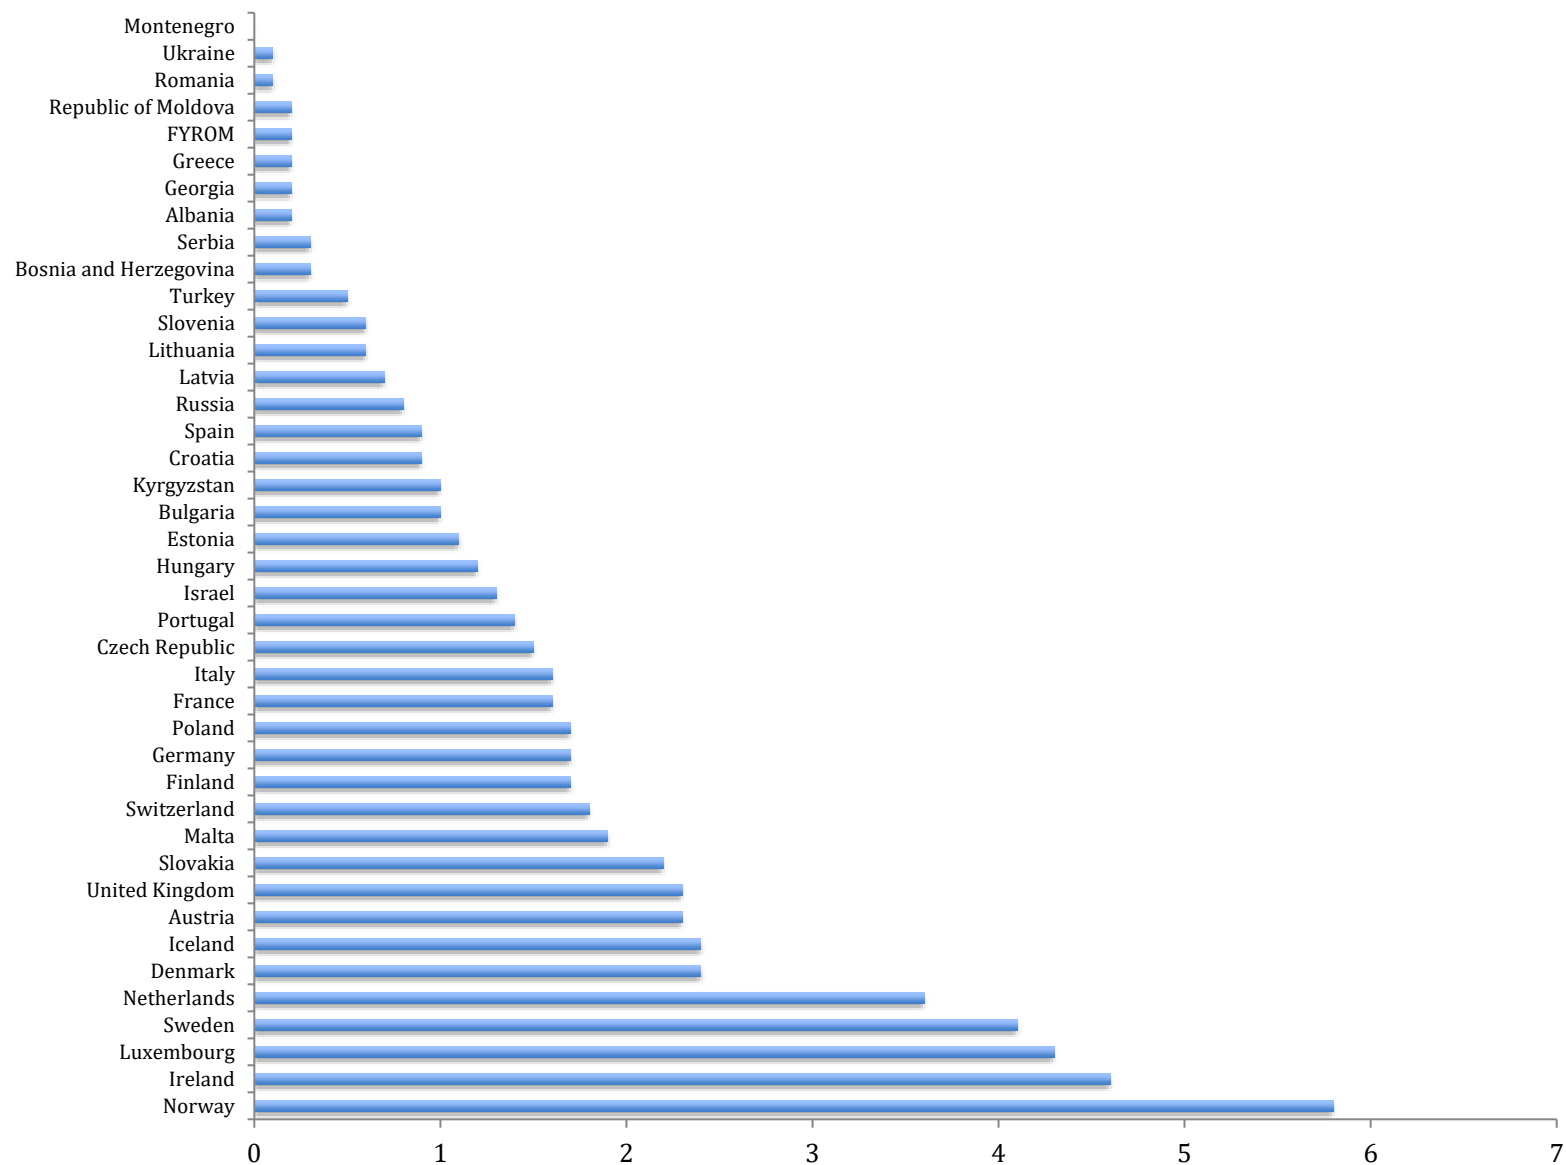

FYROM, Former Yugoslav Republic of Macedonia.

**Figure 7: Contemporary annual estimates of the proportion of patients with incident ischaemic stroke treated with intravenous thrombolysis (IVT) in 42 European countries**

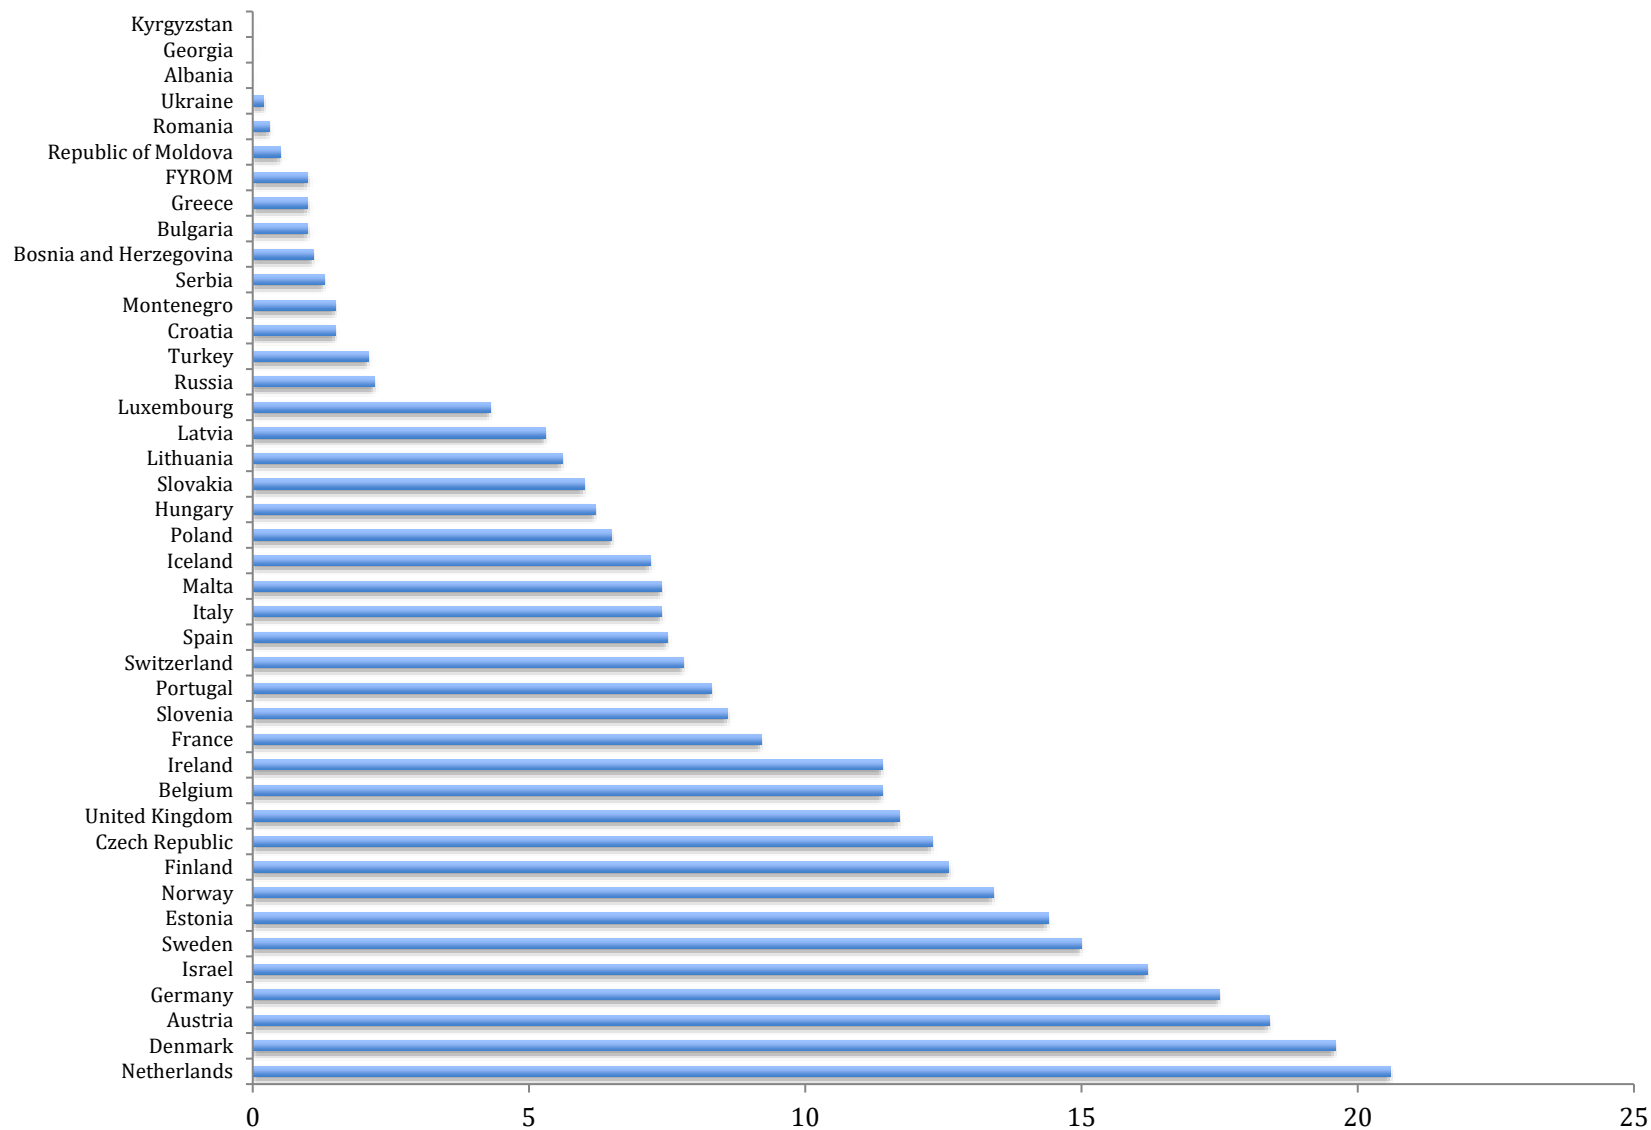

FYROM, Former Yugoslav Republic of Macedonia.

**Figure 8: Contemporary annual estimates of the proportion of patients with incident ischaemic stroke receiving endovascular treatment (EVT) in 42 European countries**

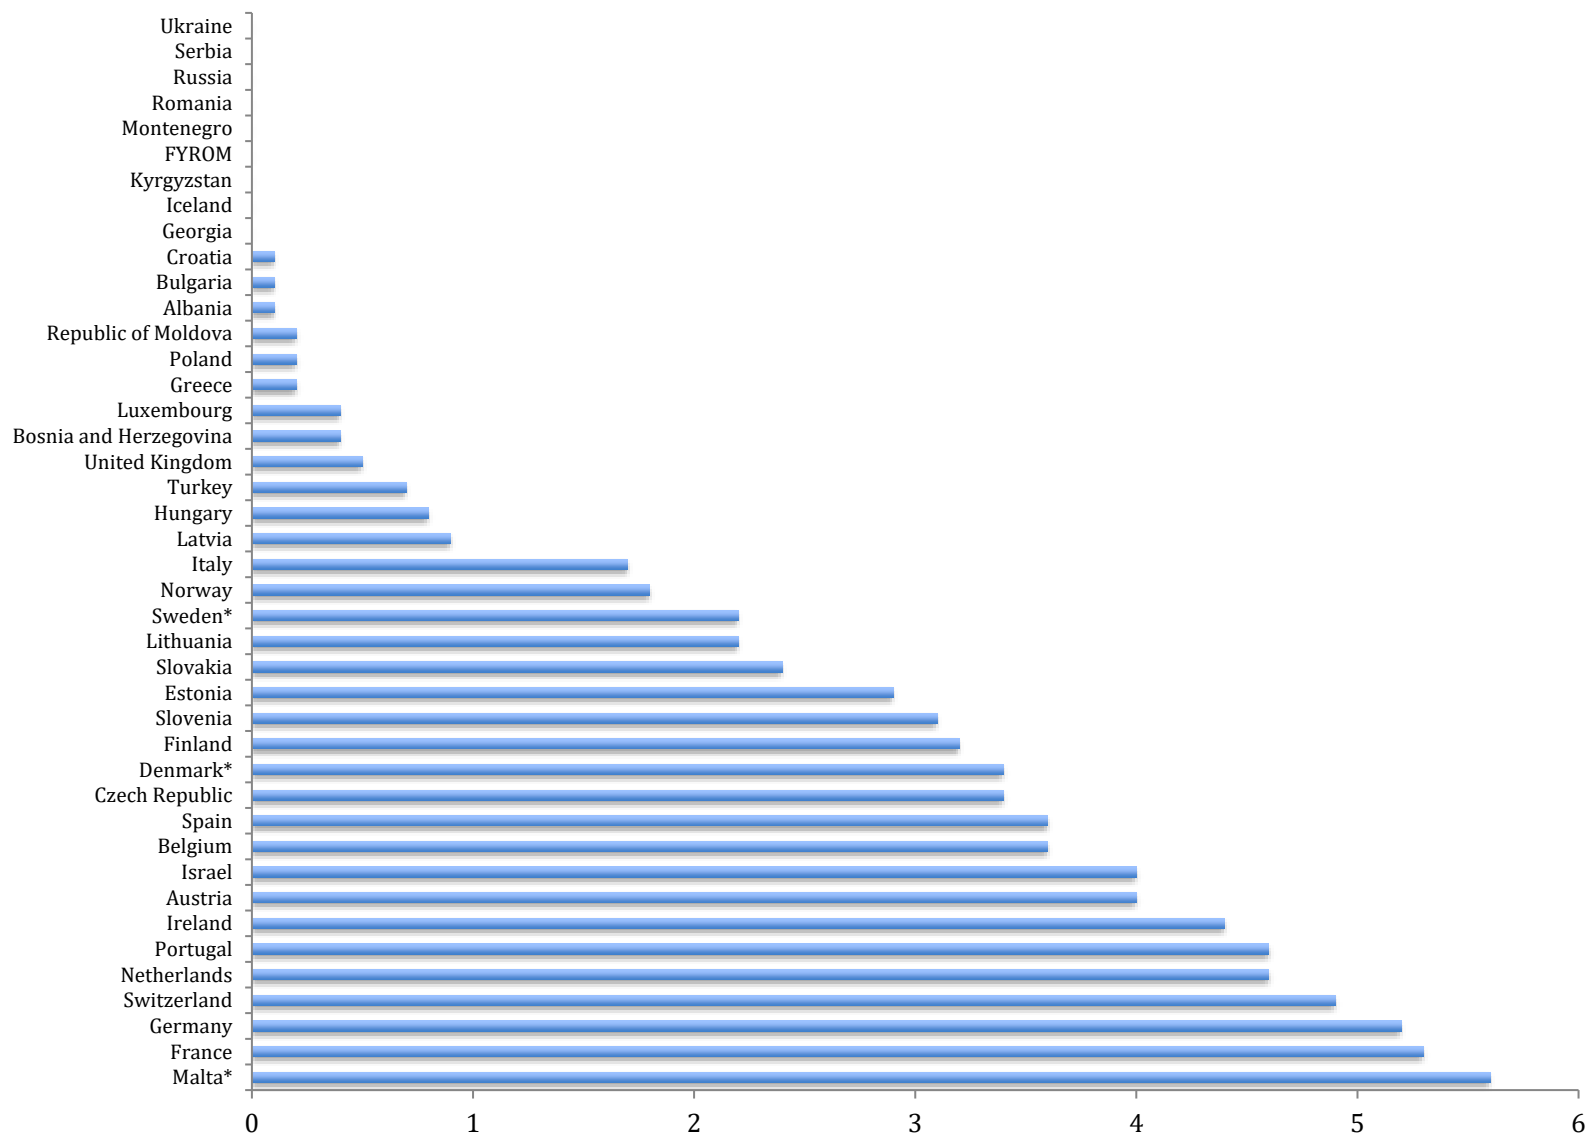

\*2015

FYROM, Former Yugoslav Republic of Macedonia.

**Figure 9: Scatter plot showing the relationship between the number of stroke units per one million inhabitants and the number of IVTs provided per million inhabitants (Pearson correlation coefficient 0.54,  $p=0.0002$ )**

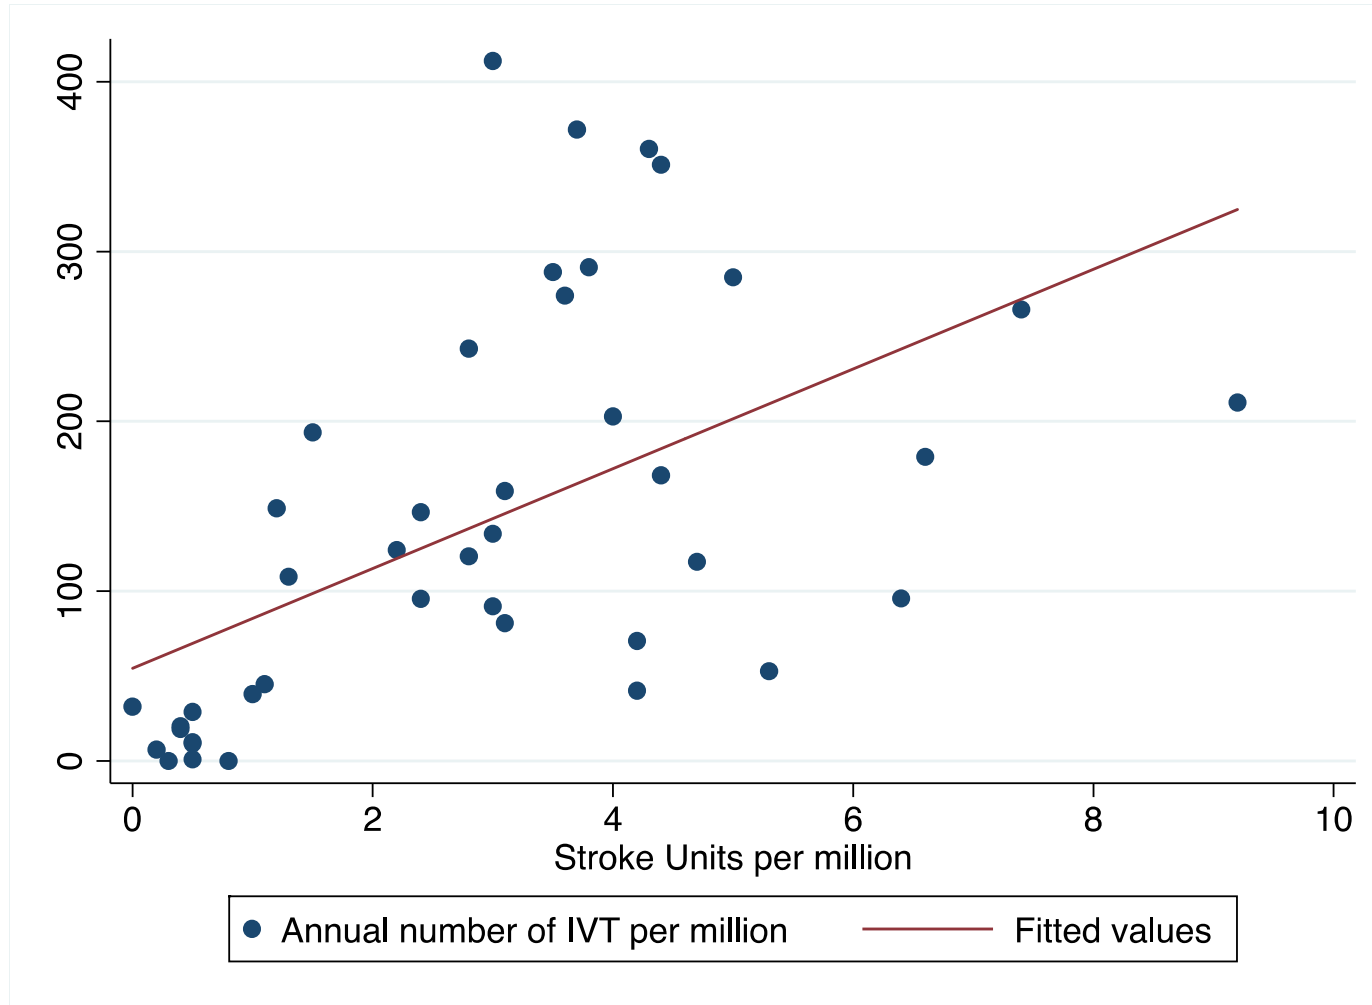

## Supplementary tables

Supplementary Table 1. National programmes for stroke care

| Country                | National programme to address stroke care recommendations | National protocol for endovascular treatment |
|------------------------|-----------------------------------------------------------|----------------------------------------------|
| Albania                | yes                                                       | planned                                      |
| Austria                | yes                                                       | yes                                          |
| Belarus                | yes                                                       | yes                                          |
| Belgium                | no                                                        | no                                           |
| Bosnia and Herzegovina | –                                                         | no                                           |
| Bulgaria               | yes                                                       | no                                           |
| Croatia                | yes                                                       | yes                                          |
| Czech Republic         | yes                                                       | planned                                      |
| Denmark                | yes                                                       | no                                           |
| Estonia                | yes                                                       | yes                                          |
| Finland                | yes                                                       | yes                                          |
| France                 | yes                                                       | yes                                          |
| Georgia                | yes                                                       | no                                           |
| Germany                | yes                                                       | no                                           |
| Greece                 | no                                                        | no                                           |
| Hungary                | yes                                                       | yes                                          |
| Iceland                | yes                                                       | planned                                      |
| Ireland                | yes                                                       | no                                           |
| Israel                 | yes                                                       | yes                                          |
| Italy                  | yes                                                       | no                                           |
| Kyrgyzstan             | no                                                        | planned                                      |
| Latvia                 | yes                                                       | planned                                      |
| Lithuania              | yes                                                       | no                                           |
| Luxembourg             | no                                                        | planned                                      |
| FYROM                  | yes                                                       | yes                                          |
| Malta                  | yes                                                       | yes                                          |
| Montenegro             | yes                                                       | yes                                          |
| Netherlands            | yes                                                       | planned                                      |
| North Cyprus           | no                                                        | planned                                      |
| Norway                 | yes                                                       | yes                                          |
| Poland                 | yes                                                       | yes                                          |
| Portugal               | yes                                                       | planned                                      |

|                            |           |           |
|----------------------------|-----------|-----------|
| <b>Republic of Moldova</b> | yes       | yes       |
| <b>Romania</b>             | yes       | no        |
| <b>Russia</b>              | yes       | no        |
| <b>Serbia</b>              | yes       | planned   |
| <b>Slovakia</b>            | yes       | yes       |
| <b>Slovenia</b>            | yes       | yes       |
| <b>Spain</b>               | yes       | yes       |
| <b>Sweden</b>              | yes       | yes       |
| <b>Switzerland</b>         | yes       | yes       |
| <b>Turkey</b>              | yes       | no        |
| <b>Ukraine</b>             | no        | no        |
| <b>United Kingdom</b>      | yes       | yes       |
| <b>Total (Yes)</b>         | <b>37</b> | <b>20</b> |

FYROM, Former Yugoslav Republic of Macedonia

**Supplementary Table 2. Countries that currently have full coverage of the overall national needs for endovascular treatment (EVT)**

| Country                | Full EVT coverage* | No. of EVT centres |
|------------------------|--------------------|--------------------|
| Albania                | no                 | 1                  |
| Austria                | yes                | 11                 |
| Belarus                | planned            | 1                  |
| Belgium                | unknown            | 17                 |
| Bosnia and Herzegovina | no                 | 1                  |
| Bulgaria               | planned            | 4                  |
| Croatia                | no                 | 2                  |
| Czech Republic         | yes                | 15                 |
| Denmark                | yes                | 3                  |
| Estonia                | yes                | 3                  |
| Finland                | yes                | 5                  |
| France                 | no                 | 37                 |
| Georgia                | no                 | 0                  |
| Germany                | yes                | 135                |
| Greece                 | no                 | 6                  |
| Hungary                | no                 | 6                  |
| Iceland                | planned            | 0                  |
| Ireland                | planned            | 2                  |
| Israel                 | yes                | 9                  |
| Italy                  | no                 | 50                 |
| Kyrgyzstan             | no                 | 0                  |
| Latvia                 | no                 | 2                  |
| Lithuania              | yes                | 6                  |
| Luxembourg             | planned            | 1                  |
| FYROM                  | yes                | 1                  |
| Malta                  | yes                | 1                  |
| Montenegro             | no                 | 0                  |
| Netherlands            | yes                | 20                 |
| North Cyprus           | yes                | 2                  |
| Norway                 | planned            | 5                  |
| Poland                 | no                 | 21                 |
| Portugal               | no                 | 9                  |
| Republic of Moldova    | no                 | 0                  |
| Romania                | no                 | 2                  |
| Russia                 | planned            | 134                |
| Serbia                 | no                 | 4                  |
| Slovakia               | yes                | 7                  |

|                       |           |            |
|-----------------------|-----------|------------|
| <b>Slovenia</b>       | yes       | 1          |
| <b>Spain</b>          | no        | 37         |
| <b>Sweden</b>         | planned   | 6          |
| <b>Switzerland</b>    | yes       | 9          |
| <b>Turkey</b>         | no        | 21         |
| <b>Ukraine</b>        | no        | 4          |
| <b>United Kingdom</b> | no        | 28         |
| <b>Total (Yes)</b>    | <b>15</b> | <b>629</b> |

FYROM, Former Yugoslav Republic of Macedonia

\*Question: "Do the available centres cover the country's overall needs for EVT?"

## Figures

Note: Choropleth maps with bi-polar colour progression and data groups distributed in equal intervals

**Figure 1: Choropleth map showing number of stroke units per million population in 42 European countries (mean 2.9, 95% CI 2.3–3.6)**



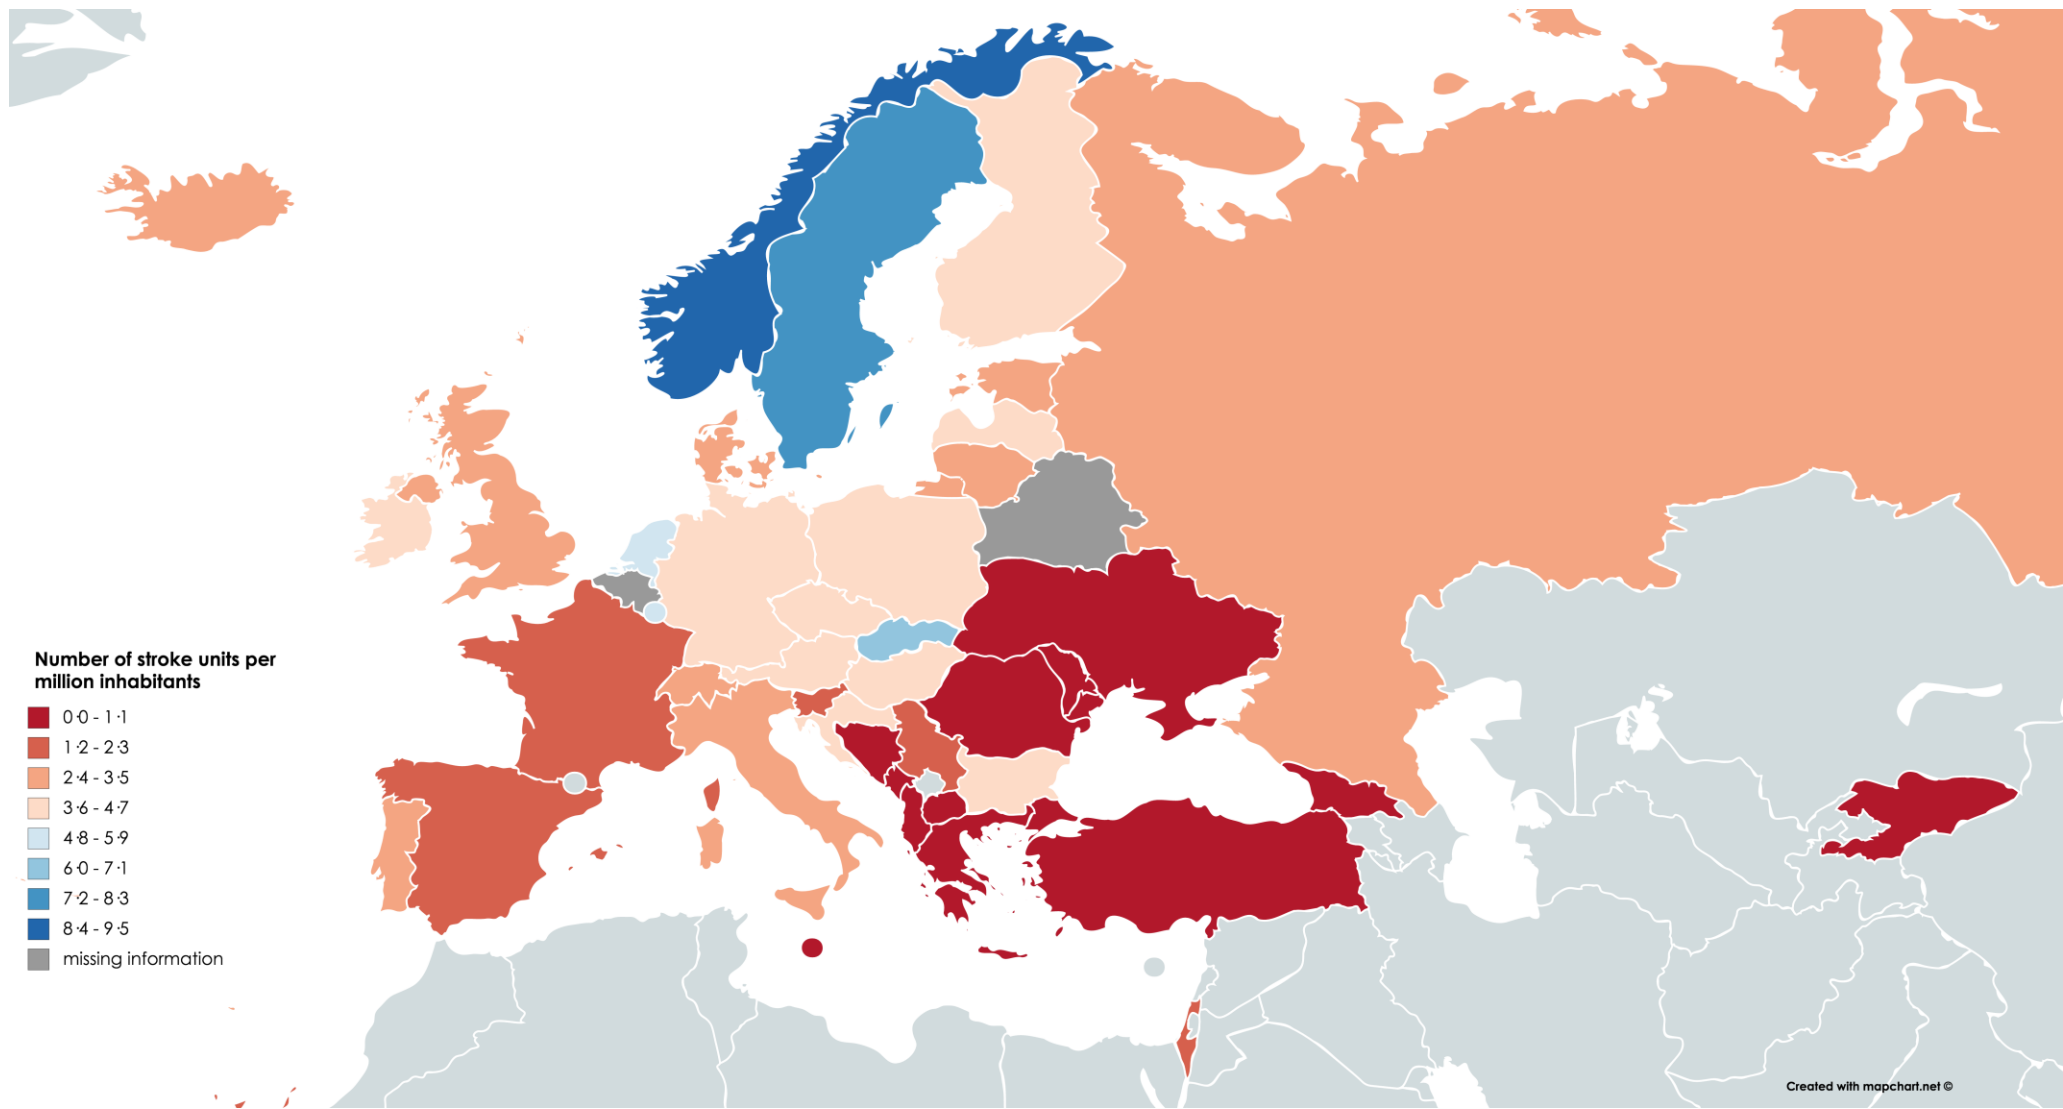

**Figure 2: Choropleth map showing contemporary annual rates of intravenous thrombolysis (IVT) per million population in 42 European countries (mean 142.0, 95% CI 107.4– 176.7)**

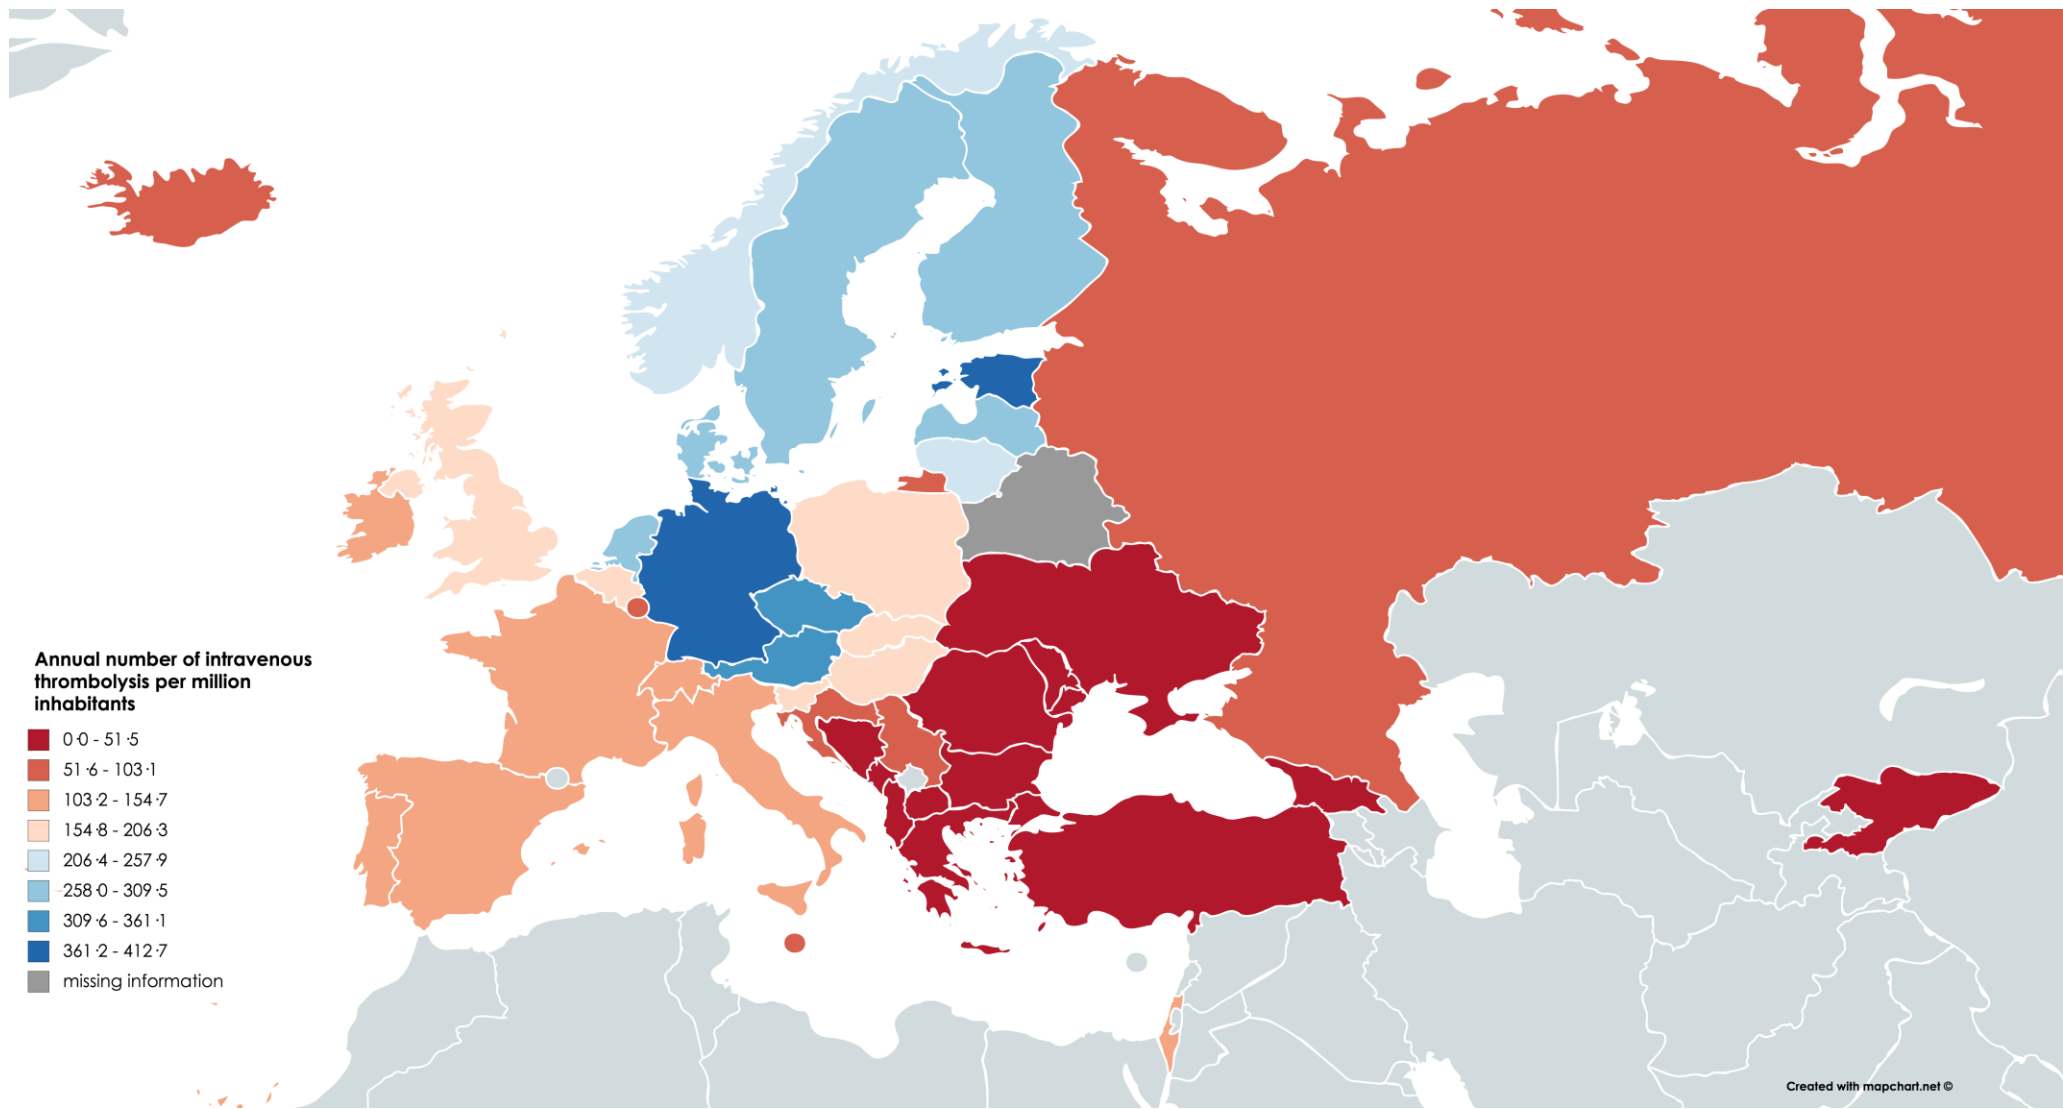

**Figure 3: Choropleth map showing contemporary annual rates of endovascular treatments (EVT) for ischaemic stroke per million population in 43 European countries (mean 37.1, 95%CI 26.7–47.5)**

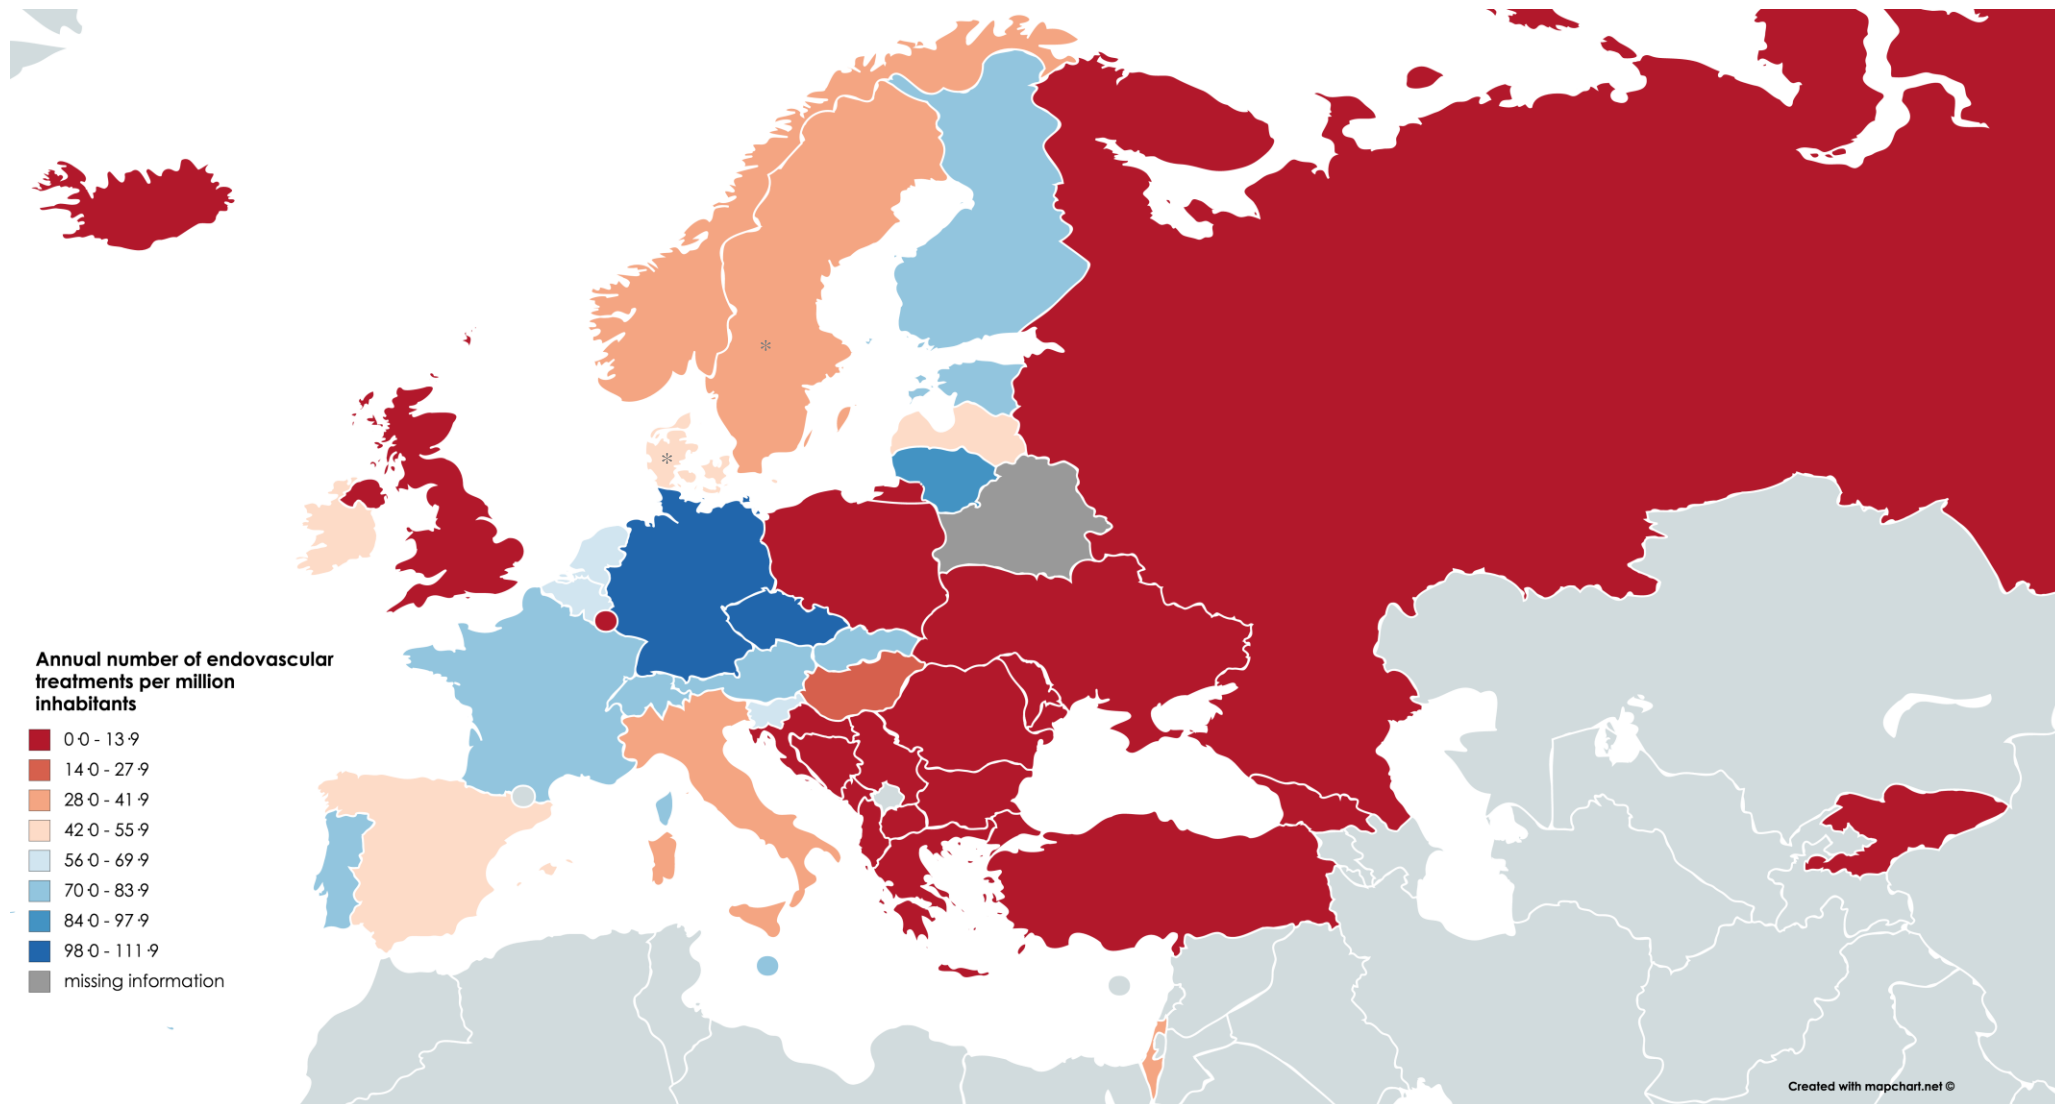

\*

\*2015

**Figure 4: Choropleth map showing number of stroke units per 1000 annual incident ischaemic strokes in 42 European countries (mean 1.5; 95% CI 1.1–1.9)**

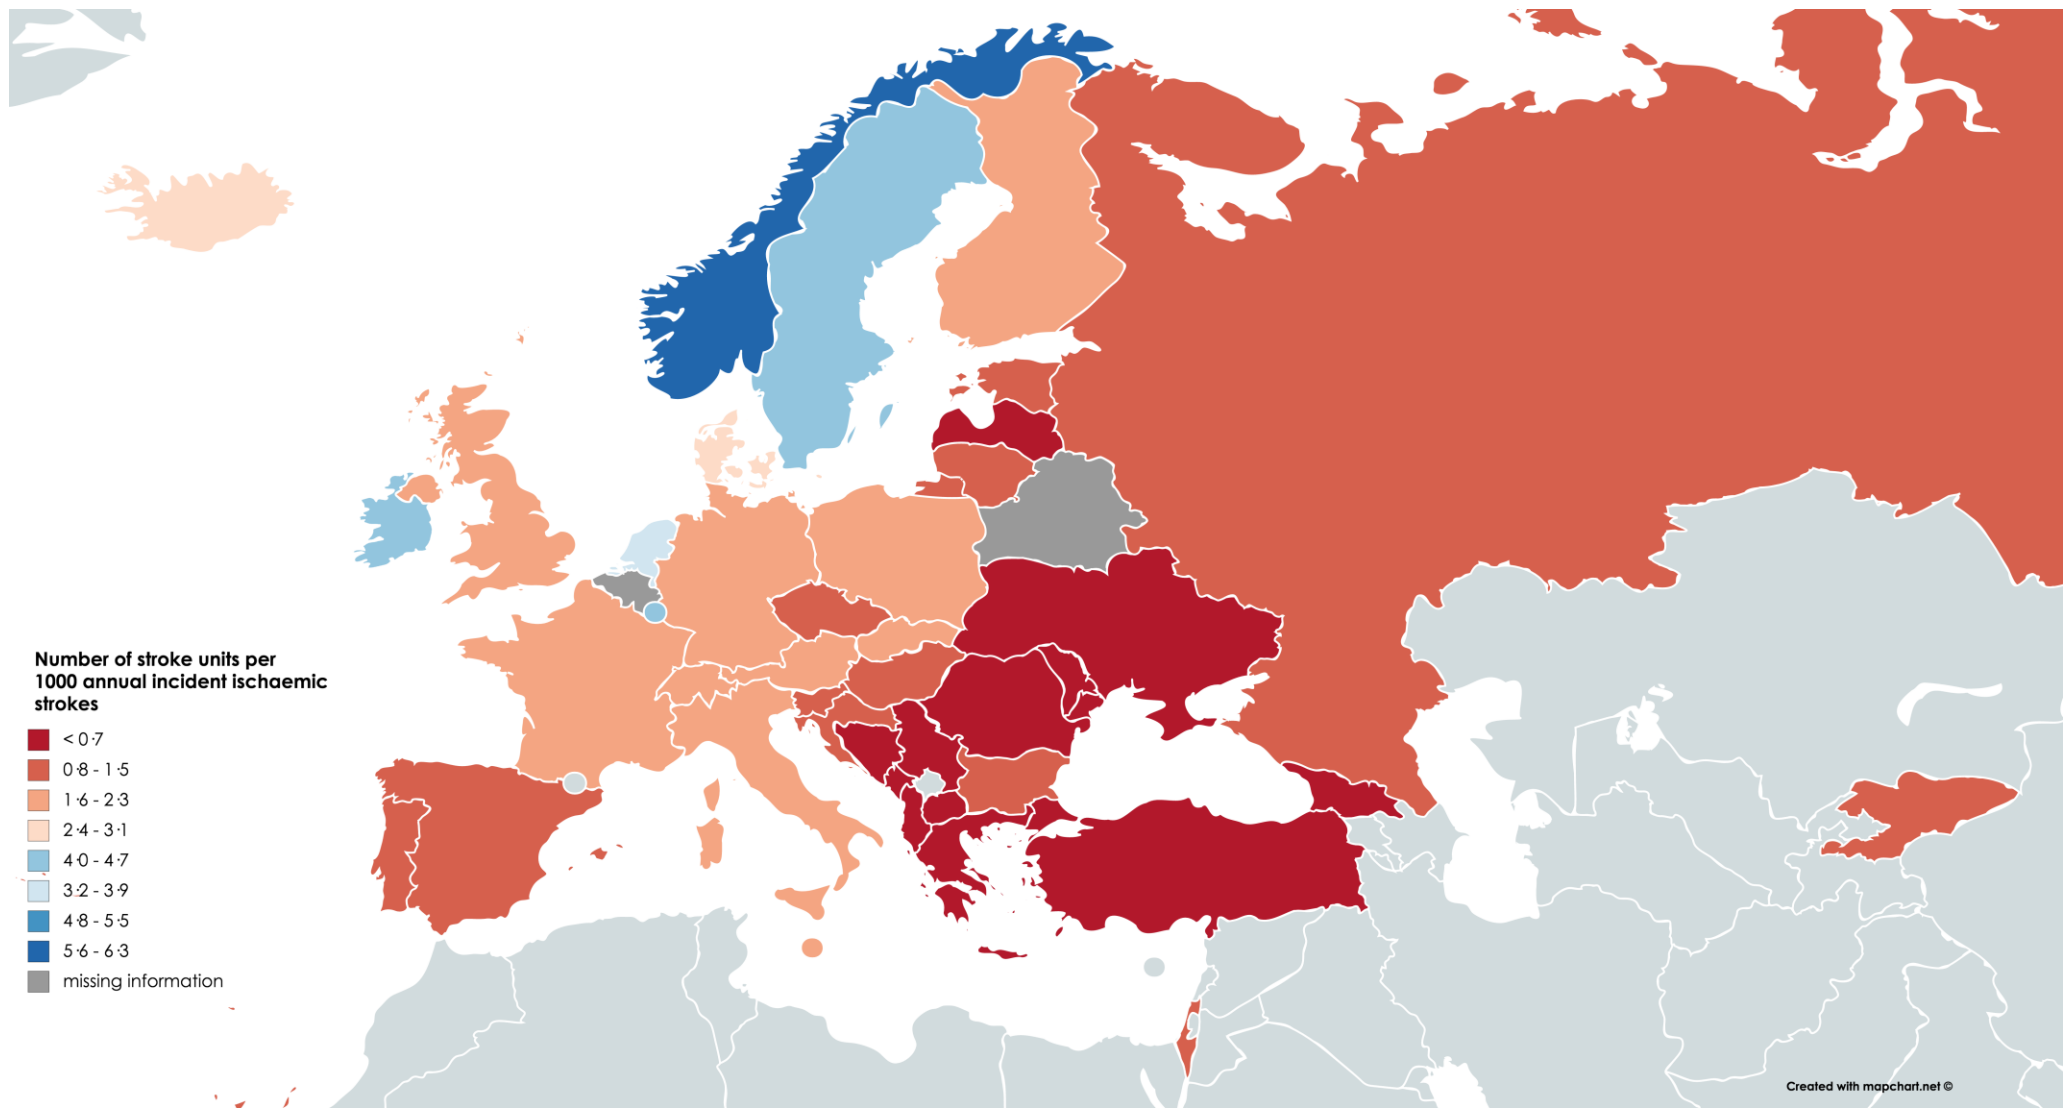

**Figure 5: Choropleth map showing contemporary annual estimates of the proportion of patients with incident ischaemic stroke treated with intravenous thrombolysis (IVT) in 42 European countries (mean 7.3%; 95% CI 5.4–9.1)<sup>†</sup>**

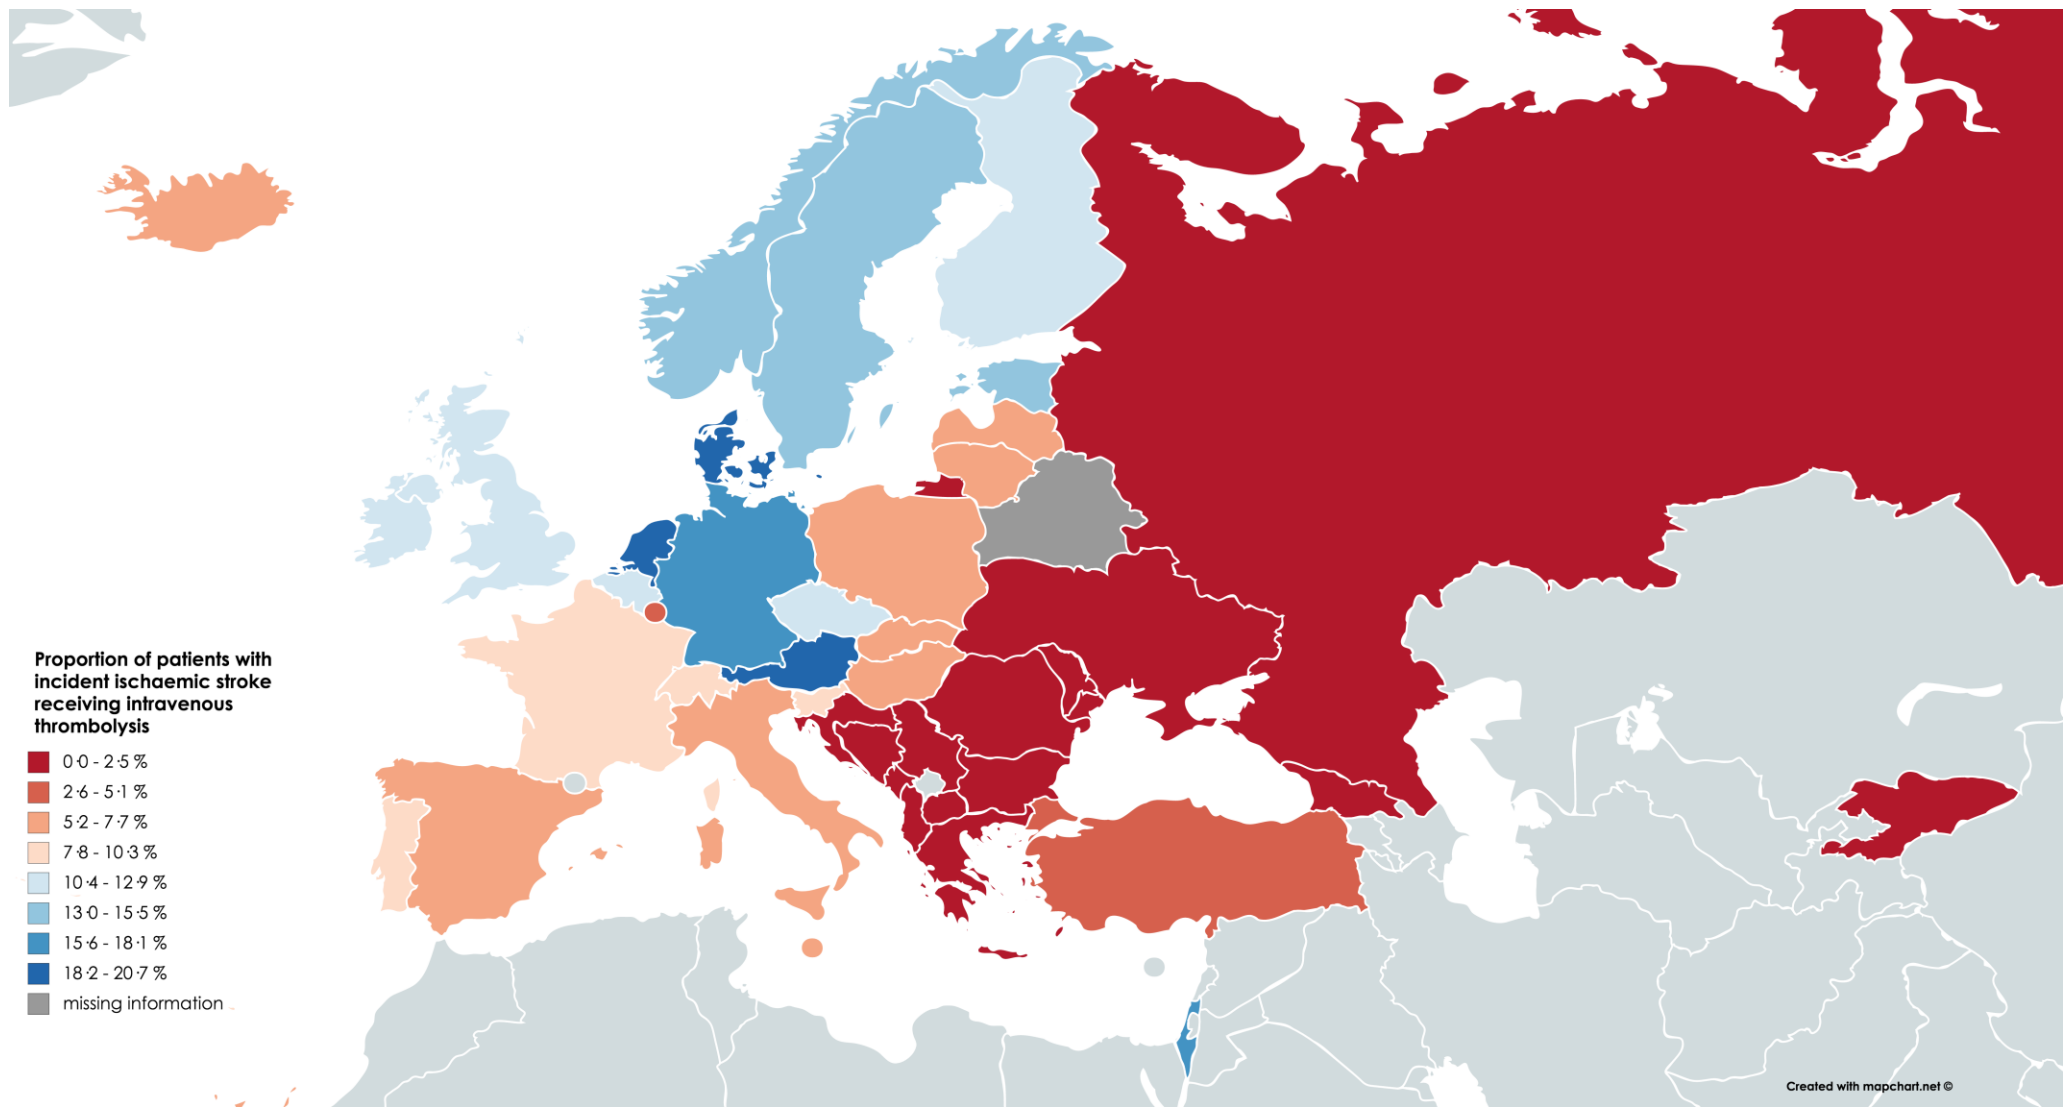



† Annual absolute number of intravenous thrombolysis in 2015 or 2016

**Figure 6: Choropleth map showing contemporary annual estimates of the proportion of patients with incident ischaemic stroke receiving endovascular treatment (EVT) in 42 European countries (mean 1.9%; 95% CI 1.3–2.5)‡**

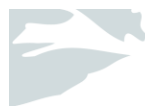

**Proportion of patients with incident ischaemic stroke receiving endovascular treatment**

- 0.0 - 0.7 %
- 0.8 - 1.5 %
- 1.6 - 2.3 %
- 2.4 - 3.1 %
- 3.2 - 3.9 %
- 4.0 - 4.7 %
- 4.8 - 5.5 %
- 5.6 - 6.3 %
- missing information

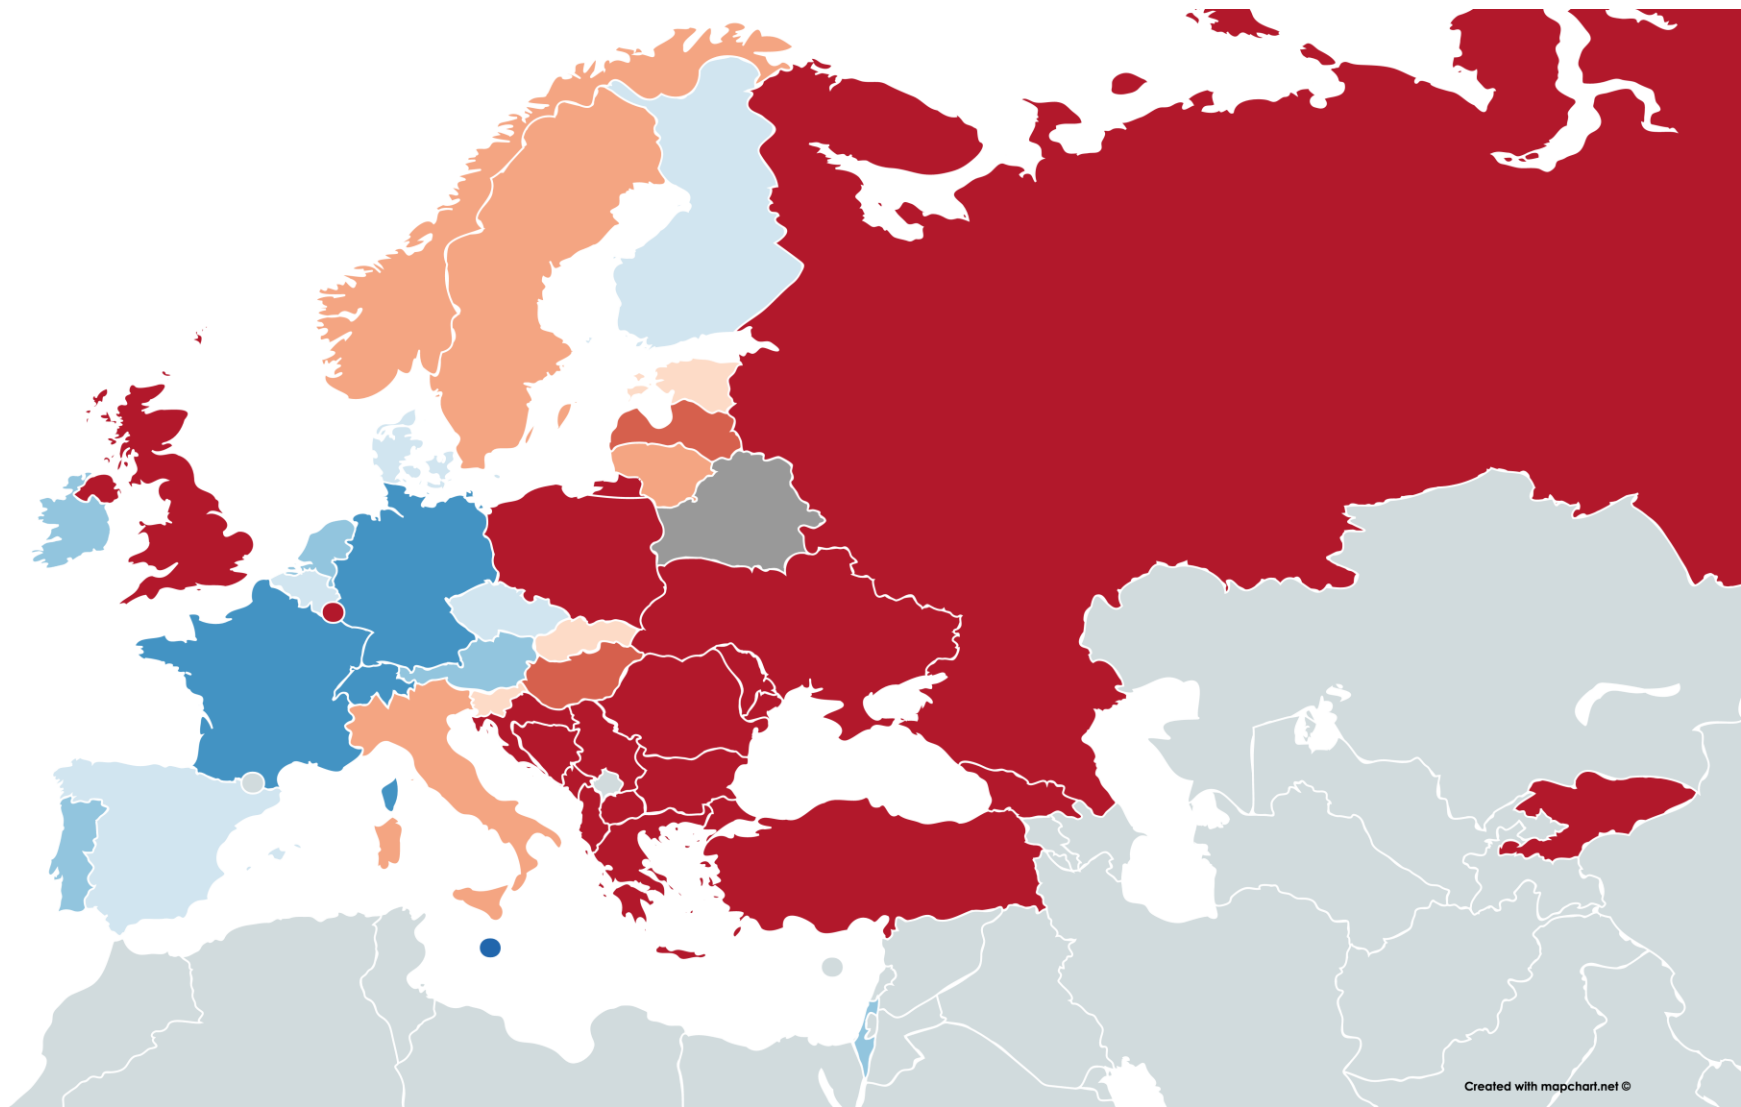

Created with mapchart.net ©

‡ Annual absolute number of endovascular treatments (EVT) for acute ischaemic stroke performed in 2016, except Denmark, Sweden, and Malta (2015).

**Table 1: Absolute and relative numbers of stroke units per million inhabitants, annual number of intravenous thrombolysis treatments (IVT), number of IVT centres, annual number of endovascular treatments (EVT), and EVT centres per country**

| Country                | No. of stroke units* | Stroke units per million | Annual no. of IVT† | Annual no. of IVT per million † | No. of IVT centres | IVT centres per million | Annual no. of EVT‡ | Annual no. of EVT per million ‡ | No. of EVT centres | No. of EVT centres 24/7 | EVT centres per million |
|------------------------|----------------------|--------------------------|--------------------|---------------------------------|--------------------|-------------------------|--------------------|---------------------------------|--------------------|-------------------------|-------------------------|
| Albania                | 1                    | 0.3                      | 0                  | 0.0                             | 0                  | 0.0                     | 6                  | 2.1                             | 1                  | 0                       | 0.3                     |
| Austria                | 38                   | 4.4                      | 3000               | 351.1                           | 38                 | 4.4                     | 650                | 76.1                            | 11                 | 9                       | 1.3                     |
| Belarus                | –                    | –                        | –                  | –                               | 12                 | 1.3                     | –                  | –                               | 1                  | 1                       | 0.1                     |
| Belgium                | –                    | –                        | 2250               | 199.1                           | –                  | –                       | 706                | 62.5                            | 17                 | 12                      | 1.5                     |
| Bosnia and Herzegovina | 4                    | 1.0                      | 150                | 39.4                            | 4                  | 1.0                     | 50                 | 13.1                            | 1                  | 1                       | 0.3                     |
| Bulgaria               | 30                   | 4.2                      | 296                | 41.4                            | 28                 | 3.9                     | 34                 | 4.8                             | 4                  | –                       | 0.6                     |
| Croatia                | 18                   | 4.2                      | 300                | 70.7                            | 20                 | 4.7                     | 30                 | 7.1                             | 2                  | 1                       | 0.5                     |
| Czech Republic         | 45                   | 4.3                      | 3800               | 360.4                           | 45                 | 4.3                     | 1063               | 100.8                           | 15                 | 15                      | 1.4                     |
| Denmark                | 20                   | 3.5                      | 1632               | 287.9                           | 10                 | 1.8                     | 280                | 49.4                            | 3                  | 3                       | 0.5                     |
| Estonia                | 4                    | 3.0                      | 541                | 412.2                           | 6                  | 4.6                     | 109                | 83.0                            | 3                  | 2                       | 2.3                     |
| Finland                | 21                   | 3.8                      | 1600               | 290.7                           | 21                 | 3.8                     | 407                | 74.0                            | 5                  | 5                       | 0.9                     |
| France                 | 140                  | 2.2                      | 8000               | 124.2                           | 140                | 2.2                     | 4589               | 71.3                            | 37                 | –                       | 0.6                     |
| Georgia                | 2                    | 0.5                      | 4                  | 1.0                             | 1                  | 0.3                     | 0                  | 0.0                             | 0                  | 0                       | 0.0                     |

|                                |     |     |       |       |     |      |      |       |     |     |     |
|--------------------------------|-----|-----|-------|-------|-----|------|------|-------|-----|-----|-----|
| <b>Germany</b>                 | 295 | 3.7 | 30000 | 371.8 | 350 | 4.3  | 9000 | 111.5 | 135 | 110 | 1.7 |
| <b>Greece</b>                  | 5   | 0.4 | 225   | 20.5  | 18  | 1.6  | 40   | 3.7   | 6   | 1   | 0.5 |
| <b>Hungary</b>                 | 39  | 4.0 | 2000  | 202.9 | 39  | 4.0  | 265  | 26.9  | 6   | 3   | 0.6 |
| <b>Iceland</b>                 | 1   | 3.0 | 30    | 91.1  | 5   | 15.2 | 0    | 0.0   | 0   | 0   | 0.0 |
| <b>Ireland</b>                 | 22  | 4.7 | 550   | 117.3 | 24  | 5.1  | 210  | 44.8  | 2   | 1   | 0.4 |
| <b>Israel</b>                  | 10  | 1.2 | 1200  | 148.8 | 20  | 2.5  | 300  | 37.2  | 9   | 9   | 1.1 |
| <b>Italy</b>                   | 178 | 3.0 | 8000  | 133.8 | 182 | 3.0  | 1882 | 31.5  | 50  | 16  | 0.8 |
| <b>Kyrgyzstan</b>              | 5   | 0.8 | 0     | 0.0   | 0   | 0.0  | 0    | 0.0   | 0   | 0   | 0.0 |
| <b>Latvia</b>                  | 7   | 3.6 | 540   | 274.0 | 7   | 3.6  | 95   | 48.2  | 2   | 1   | 1.0 |
| <b>Lithuania</b>               | 8   | 2.8 | 699   | 242.8 | 10  | 3.5  | 276  | 95.9  | 6   | 3   | 2.1 |
| <b>Luxembourg</b>              | 3   | 5.3 | 30    | 52.9  | 3   | 5.3  | 3    | 5.3   | 1   | –   | 1.8 |
| <b>FYROM</b>                   | 1   | 0.5 | 60    | 28.9  | 1   | 0.5  | 2    | 1.0   | 1   | 0   | 0.5 |
| <b>Malta</b>                   | 1   | 2.4 | 40    | 95.5  | 2   | 4.8  | 30   | 71.7  | 1   | 1   | 2.4 |
| <b>Montenegro</b>              | 0   | 0.0 | 20    | 32.0  | 3   | 4.8  | 0    | 0.0   | 0   | 0   | 0.0 |
| <b>Netherlands</b>             | 85  | 5.0 | 4821  | 284.8 | 85  | 5.0  | 1088 | 64.3  | 20  | 20  | 1.2 |
| <b>Northern<br/>Cyprus</b>     | 2   | 6.4 | 30    | 95.7  | 2   | 6.4  | 20   | 63.8  | 2   | 2   | 6.4 |
| <b>Norway</b>                  | 48  | 9.2 | 1100  | 211.1 | 49  | 9.4  | 150  | 28.8  | 5   | –   | 1.0 |
| <b>Poland</b>                  | 171 | 4.4 | 6493  | 168.2 | 171 | 4.4  | 175  | 4.5   | 21  | 4   | 0.5 |
| <b>Portugal</b>                | 25  | 2.4 | 1516  | 146.5 | 25  | 2.4  | 845  | 81.6  | 9   | 4   | 0.9 |
| <b>Republic of<br/>Moldova</b> | 2   | 0.5 | 45    | 11.1  | 2   | 0.5  | 20   | 4.9   | 0   | 0   | 0.0 |
| <b>Romania</b>                 | 10  | 0.5 | 200   | 10.3  | 10  | 0.5  | 15   | 0.8   | 2   | 0   | 0.1 |
| <b>Russia</b>                  | 451 | 3.1 | 11651 | 81.2  | 451 | 3.1  | 260  | 1.8   | 134 | 37  | 0.9 |
| <b>Serbia</b>                  | 10  | 1.4 | 400   | 56.8  | 20  | 2.8  | 10   | 1.4   | 4   | 3   | 0.6 |
| <b>Slovakia</b>                | 36  | 6.6 | 972   | 179.1 | 44  | 8.1  | 385  | 71.0  | 7   | 3   | 1.3 |
| <b>Slovenia</b>                | 3   | 1.5 | 400   | 193.5 | 12  | 5.8  | 142  | 69.2  | 1   | 1   | 0.5 |
| <b>Spain</b>                   | 60  | 1.3 | 5002  | 108.5 | 59  | 1.3  | 2408 | 52.2  | 37  | 35  | 0.8 |

|                              |             |                      |               |                            |             |                      |              |                         |            |            |                      |
|------------------------------|-------------|----------------------|---------------|----------------------------|-------------|----------------------|--------------|-------------------------|------------|------------|----------------------|
| <b>Sweden</b>                | 72          | 7.4                  | 2600          | 265.9                      | 72          | 7.4                  | 390          | 39.9                    | 6          | 3          | 0.6                  |
| <b>Switzerland</b>           | 23          | 2.8                  | 1000          | 120.5                      | 23          | 2.8                  | 626          | 75.4                    | 9          | 9          | 1.1                  |
| <b>Turkey</b>                | 33          | 0.4                  | 1480          | 18.8                       | 41          | 0.5                  | 456          | 5.8                     | 21         | 10         | 0.3                  |
| <b>Ukraine</b>               | 10          | 0.2                  | 300           | 6.7                        | 27          | 0.6                  | 10           | 0.2                     | 4          | –          | 0.6                  |
| <b>United Kingdom</b>        | 200         | 3.1                  | 10290         | 159.0                      | 200         | 3.1                  | 478          | 7.4                     | 28         | 2          | 0.1                  |
| <b>Total / Mean [95% CI]</b> | <b>2139</b> | <b>2.9 [2.3–3.6]</b> | <b>113267</b> | <b>142.0 [107.4–176.7]</b> | <b>2282</b> | <b>3.6 [2.7–4.4]</b> | <b>27505</b> | <b>37.1 [26.7–47.5]</b> | <b>629</b> | <b>327</b> | <b>0.9 [0.6–1.2]</b> |

FYROM, Former Yugoslav Republic of Macedonia.

\* According to the local definition of stroke unit.

† Annual absolute number of intravenous thrombolysis in 2015 or 2016

‡ Annual absolute number of endovascular treatments (EVT) for acute ischaemic stroke performed in 2016, except Denmark, Sweden, and Malta (2015).

**Table 2: Relative numbers of stroke units, annual number of intravenous thrombolysis (IVT) treatments, IVT centres, annual endovascular treatment (EVT), and EVT centres per annual incident ischaemic strokes\***

| Country                | Annual no. of incident ischaemic strokes* | Stroke units per 1000 ischaemic strokes | Annual no. of IVTs per 1000 ischaemic strokes | Proportion of stroke patients with IVT (%) | IVT hospitals per 1000 ischaemic strokes | Annual no. of EVTs per 1000 ischaemic strokes | Proportion of ischaemic stroke patients with EVT (%) | EVT centres per 1000 ischaemic strokes |
|------------------------|-------------------------------------------|-----------------------------------------|-----------------------------------------------|--------------------------------------------|------------------------------------------|-----------------------------------------------|------------------------------------------------------|----------------------------------------|
| Albania                | 4815                                      | 0.2                                     | 0.0                                           | 0.0                                        | 0.0                                      | 1.2                                           | 0.1                                                  | 0.2                                    |
| Austria                | 16314                                     | 2.3                                     | 183.9                                         | 18.4                                       | 2.3                                      | 39.8                                          | 4.0                                                  | 0.7                                    |
| Belarus                | 30056                                     | -                                       | -                                             | -                                          | 0.4                                      | -                                             | -                                                    | 0.0                                    |
| Belgium                | 19689                                     | -                                       | 114.3                                         | 11.4                                       | -                                        | 35.9                                          | 3.6                                                  | 0.9                                    |
| Bosnia and Herzegovina | 13580                                     | 0.3                                     | 11.0                                          | 1.1                                        | 0.3                                      | 3.7                                           | 0.4                                                  | 0.1                                    |
| Bulgaria               | 28869                                     | 1.0                                     | 10.3                                          | 1.0                                        | 1.0                                      | 1.2                                           | 0.1                                                  | 0.1                                    |
| Croatia                | 20278                                     | 0.9                                     | 14.8                                          | 1.5                                        | 1.0                                      | 1.5                                           | 0.1                                                  | 0.1                                    |
| Czech Republic         | 30877                                     | 1.5                                     | 123.1                                         | 12.3                                       | 1.5                                      | 34.4                                          | 3.4                                                  | 0.5                                    |
| Denmark                | 8339                                      | 2.4                                     | 195.7                                         | 19.6                                       | 1.2                                      | 33.6                                          | 3.4                                                  | 0.4                                    |
| Estonia                | 3757                                      | 1.1                                     | 144.0                                         | 14.4                                       | 1.6                                      | 29.0                                          | 2.9                                                  | 0.8                                    |
| Finland                | 12685                                     | 1.7                                     | 126.1                                         | 12.6                                       | 1.7                                      | 32.1                                          | 3.2                                                  | 0.4                                    |
| France                 | 87372                                     | 1.6                                     | 91.6                                          | 9.2                                        | 1.6                                      | 52.5                                          | 5.3                                                  | 0.4                                    |
| Georgia                | 8973                                      | 0.2                                     | 0.4                                           | 0.0                                        | 0.1                                      | 0.0                                           | 0.0                                                  | 0.0                                    |
| Germany                | 171801                                    | 1.7                                     | 174.6                                         | 17.5                                       | 2.0                                      | 52.4                                          | 5.2                                                  | 0.8                                    |
| Greece                 | 22182                                     | 0.2                                     | 10.1                                          | 1.0                                        | 0.8                                      | 1.8                                           | 0.2                                                  | 0.3                                    |
| Hungary                | 32335                                     | 1.2                                     | 61.9                                          | 6.2                                        | 1.2                                      | 8.2                                           | 0.8                                                  | 0.2                                    |
| Iceland                | 419                                       | 2.4                                     | 71.6                                          | 7.2                                        | 11.9                                     | 0.0                                           | 0.0                                                  | 0.0                                    |
| Ireland                | 4809                                      | 4.6                                     | 114.4                                         | 11.4                                       | 5.0                                      | 43.7                                          | 4.4                                                  | 0.4                                    |

|                                |         |     |       |      |     |      |     |     |
|--------------------------------|---------|-----|-------|------|-----|------|-----|-----|
| <b>Israel</b>                  | 7411    | 1.3 | 161.9 | 16.2 | 2.7 | 40.5 | 4.0 | 1.2 |
| <b>Italy</b>                   | 108811  | 1.6 | 73.5  | 7.4  | 1.7 | 17.3 | 1.7 | 0.5 |
| <b>Kyrgyzstan</b>              | 5238    | 1.0 | 0.0   | 0.0  | 0.0 | 0.0  | 0.0 | 0.0 |
| <b>Latvia</b>                  | 10282   | 0.7 | 52.5  | 5.3  | 0.7 | 9.2  | 0.9 | 0.2 |
| <b>Lithuania</b>               | 12539   | 0.6 | 55.7  | 5.6  | 0.8 | 22.0 | 2.2 | 0.5 |
| <b>Luxembourg</b>              | 700     | 4.3 | 42.9  | 4.3  | 4.3 | 4.3  | 0.4 | 1.4 |
| <b>FYROM</b>                   | 5939    | 0.2 | 10.1  | 1.0  | 0.2 | 0.3  | 0.0 | 0.2 |
| <b>Malta</b>                   | 537     | 1.9 | 74.5  | 7.4  | 3.7 | 55.9 | 5.6 | 1.9 |
| <b>Montenegro</b>              | 1315    | 0.0 | 15.2  | 1.5  | 2.3 | 0.0  | 0.0 | 0.0 |
| <b>Netherlands</b>             | 23458   | 3.6 | 205.5 | 20.6 | 3.6 | 46.4 | 4.6 | 0.9 |
| <b>Northern<br/>Cyprus</b>     | -       | -   | -     | -    | -   | -    | -   | -   |
| <b>Norway</b>                  | 8230    | 5.8 | 133.7 | 13.4 | 6.0 | 18.2 | 1.8 | 0.6 |
| <b>Poland</b>                  | 99397   | 1.7 | 65.3  | 6.5  | 1.7 | 1.8  | 0.2 | 0.2 |
| <b>Portugal</b>                | 18208   | 1.4 | 83.3  | 8.3  | 1.4 | 46.4 | 4.6 | 0.5 |
| <b>Republic of<br/>Moldova</b> | 9592    | 0.2 | 4.7   | 0.5  | 0.2 | 2.1  | 0.2 | 0.0 |
| <b>Romania</b>                 | 79247   | 0.1 | 2.5   | 0.3  | 0.1 | 0.2  | 0.0 | 0.0 |
| <b>Russia</b>                  | 538984† | 0.8 | 21.6  | 2.2  | 0.8 | 0.5  | 0.0 | 0.2 |
| <b>Serbia</b>                  | 31632   | 0.3 | 12.6  | 1.3  | 0.6 | 0.3  | 0.0 | 0.1 |
| <b>Slovakia</b>                | 16273   | 2.2 | 59.7  | 6.0  | 2.7 | 23.7 | 2.4 | 0.4 |
| <b>Slovenia</b>                | 4629    | 0.6 | 86.4  | 8.6  | 2.6 | 30.7 | 3.1 | 0.2 |
| <b>Spain</b>                   | 66594   | 0.9 | 75.1  | 7.5  | 0.9 | 36.2 | 3.6 | 0.6 |
| <b>Sweden</b>                  | 17361   | 4.1 | 149.8 | 15.0 | 4.1 | 22.5 | 2.2 | 0.3 |
| <b>Switzerland</b>             | 12896   | 1.8 | 77.5  | 7.8  | 1.8 | 48.5 | 4.9 | 0.7 |
| <b>Turkey</b>                  | 69064   | 0.5 | 21.4  | 2.1  | 0.6 | 6.6  | 0.7 | 0.3 |
| <b>Ukraine</b>                 | 160904  | 0.1 | 1.9   | 0.2  | 0.2 | 0.1  | 0.0 | 0.0 |
| <b>United</b>                  | 87594   | 2.3 | 117.5 | 11.7 | 2.3 | 5.5  | 0.5 | 0.3 |



| <b>Kingdom</b>               |                |                      |                         |                       |                      |                         |                       |                      |
|------------------------------|----------------|----------------------|-------------------------|-----------------------|----------------------|-------------------------|-----------------------|----------------------|
| <b>Total / Mean [95% CI]</b> | <b>1913985</b> | <b>1.5 [1.1–1.9]</b> | <b>72.7 [54.2–91.2]</b> | <b>7.3% [5.4–9.1]</b> | <b>1.9 [1.3–2.5]</b> | <b>19.3 [13.5–25.1]</b> | <b>1.9% [1.3–2.5]</b> | <b>0.4 [0.3–0.5]</b> |

FYROM, Former Yugoslav Republic of Macedonia.

\* According to Global Burden of Disease estimates (2016)<sup>18</sup>

† According to the local experts the incidence of ischemic stroke is overestimated

**Table 3: Estimated number of additional stroke units and comprehensive stroke centres required to achieve three stroke units per one million inhabitants and one comprehensive stroke centre per one million inhabitants, and estimated number of additional treatments with intravenous thrombolysis and endovascular interventions if rates of 10% and 3%, respectively, are to be achieved.**

| <b>Country</b>         | <b>No. of additional stroke units required</b> | <b>No. of additional comprehensive stroke centres required</b> | <b>No. of additional intravenous thrombolysis treatments per year (target rate 18%)</b> | <b>No. of additional endovascular treatments per year (target rate 5%)</b> |
|------------------------|------------------------------------------------|----------------------------------------------------------------|-----------------------------------------------------------------------------------------|----------------------------------------------------------------------------|
| Albania                | 8                                              | 2                                                              | 867                                                                                     | 235                                                                        |
| Austria                | 0                                              | 0                                                              | 0                                                                                       | 166                                                                        |
| Belarus                | –                                              | 8                                                              | -                                                                                       | -                                                                          |
| Belgium                | –                                              | 0                                                              | 1294                                                                                    | 278                                                                        |
| Bosnia and Herzegovina | 7                                              | 3                                                              | 2294                                                                                    | 629                                                                        |
| Bulgaria               | 0                                              | 3                                                              | 4900                                                                                    | 1409                                                                       |
| Croatia                | 0                                              | 2                                                              | 3350                                                                                    | 984                                                                        |
| Czech Republic         | 0                                              | 0                                                              | 1758                                                                                    | 481                                                                        |
| Denmark                | 0                                              | 3                                                              | 0                                                                                       | 137                                                                        |
| Estonia                | 0                                              | 0                                                              | 135                                                                                     | 79                                                                         |
| Finland                | 0                                              | 1                                                              | 683                                                                                     | 227                                                                        |
| France                 | 53                                             | 27                                                             | 7727                                                                                    | 0                                                                          |
| Georgia                | 10                                             | 4                                                              | 1611                                                                                    | 449                                                                        |
| Germany                | 0                                              | 0                                                              | 924                                                                                     | 0                                                                          |
| Greece                 | 28                                             | 5                                                              | 3768                                                                                    | 1069                                                                       |
| Hungary                | 0                                              | 4                                                              | 3820                                                                                    | 1352                                                                       |
| Iceland                | 0                                              | 0                                                              | 45                                                                                      | 21                                                                         |
| Ireland                | 0                                              | 3                                                              | 316                                                                                     | 30                                                                         |

|                            |     |    |                    |                    |
|----------------------------|-----|----|--------------------|--------------------|
| <b>Israel</b>              | 14  | 0  | 134                | 71                 |
| <b>Italy</b>               | 1   | 10 | 11586              | 3559               |
| <b>Kyrgyzstan</b>          | 13  | 6  | 943                | 262                |
| <b>Latvia</b>              | 0   | 0  | 1311               | 419                |
| <b>Lithuania</b>           | 1   | 0  | 1558               | 351                |
| <b>Luxembourg</b>          | 0   | 0  | 96                 | 32                 |
| <b>FYROM</b>               | 5   | 1  | 1009               | 295                |
| <b>Malta</b>               | 0   | 0  | 57                 | 0                  |
| <b>Montenegro</b>          | 2   | 1  | 217                | 66                 |
| <b>Netherlands</b>         | 0   | 0  | 0                  | 85                 |
| <b>Northern Cyprus</b>     | 0   | 0  | -                  | -                  |
| <b>Norway</b>              | 0   | 0  | 381                | 262                |
| <b>Poland</b>              | 0   | 18 | 11398              | 4795               |
| <b>Portugal</b>            | 6   | 1  | 1761               | 65                 |
| <b>Republic of Moldova</b> | 10  | 4  | 1682               | 460                |
| <b>Romania</b>             | 49  | 18 | 14064              | 3947               |
| <b>Russia</b>              | 0   | 9  | 85366 <sup>†</sup> | 26689 <sup>†</sup> |
| <b>Serbia</b>              | 11  | 3  | 5294               | 1572               |
| <b>Slovakia</b>            | 0   | 0  | 1957               | 429                |
| <b>Slovenia</b>            | 3   | 1  | 433                | 89                 |
| <b>Spain</b>               | 78  | 9  | 6985               | 922                |
| <b>Sweden</b>              | 0   | 4  | 525                | 478                |
| <b>Switzerland</b>         | 2   | 0  | 1321               | 19                 |
| <b>Turkey</b>              | 203 | 58 | 10952              | 2997               |
| <b>Ukraine</b>             | 124 | 41 | 28663              | 8035               |
| <b>United Kingdom</b>      | 0   | 37 | 5477               | 3902               |

|              |            |            |               |              |
|--------------|------------|------------|---------------|--------------|
| <b>Total</b> | <b>628</b> | <b>286</b> | <b>226662</b> | <b>67347</b> |
|--------------|------------|------------|---------------|--------------|

FYROM, Former Yugoslav Republic of Macedonia

† According to the local experts the incidence of ischemic stroke is overestimated
